# Supplementary material for: Bis(2-methoxyethyl)ether promoted intramolecular acceptorless dehydrogenative coupling to construct structurally diverse quinazolinones by molecular oxygen
Source: Royal Society of Chemistry journal article supplement (doi:10.1039/d1gc04581d), 2022-01-01
Supplement: d1gc04581d1.pdf [file d1gc04581d1.pdf]

*Supporting information for*

**Bis(2-methoxyethyl)ether promoted intramolecular acceptorless dehydrogenative coupling to construct structurally diverse quinazolinones by molecular oxygen**

Rongrong Zhao<sup>§</sup>, Simiaomiao Wen<sup>§</sup>, Hao Fu, Mengna Liu, Qixing Liu\* and Haifeng Zhou\*

Research Center of Green Pharmaceutical Technology and Process, Hubei Key Laboratory of Natural Products Research and Development, College of Biological and Pharmaceutical Sciences, China Three Gorges University, 443002, Yichang, China.

E-mail: qixingliu86@163.com; zhouhf@ctgu.edu.cn

§ These authors contributed equally to this work.

|                                                                             |    |
|-----------------------------------------------------------------------------|----|
| <b>1. General information</b> .....                                         | 2  |
| <b>2. General procedure for synthesis of substrates</b> .....               | 2  |
| <b>3. General procedure for the synthesis of compound 2 or 4 or 6</b> ..... | 3  |
| <b>4. Gram-scale synthesis of compound 2a</b> .....                         | 3  |
| <b>5. Control experiments</b> .....                                         | 3  |
| <b>6. Analytical data of the products</b> .....                             | 4  |
| <b>7. NMR spectra</b> .....                                                 | 11 |
| <b>8. HRMS spectra</b> .....                                                | 40 |

## 1. General information

Unless otherwise noted, all reagents, catalysts and solvents were purchased from commercial suppliers and used without further purification. Column chromatography was performed with silica gel (200-300 mesh). NMR spectra were recorded on Bruker AVANCE III (400 MHz) spectrometers. CDCl<sub>3</sub> or DMSO-*d*<sub>6</sub> was the solvent used for the NMR analysis, with tetramethyl silane as an internal standard. Chemical shifts were reported up field to TMS (0.00 ppm) for <sup>1</sup>H NMR and relative to CDCl<sub>3</sub> (77.0 ppm) for <sup>13</sup>C NMR. HRMS spectra were acquired using a waters G2-XS QToF mass spectrometer.

## 2. General procedure for synthesis of substrates

### 2.1 A typical procedure for the synthesis of 1<sup>[1]</sup>

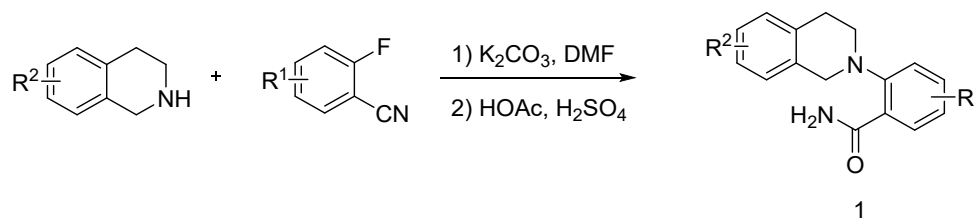

To a solution of K<sub>2</sub>CO<sub>3</sub> (6.6 mmol) in DMF (5 mL), 1,2,3,4-tetrahydroisoquinoline (6.6 mmol) and 2-fluorobenzonitrile (6 mmol) were added. The reaction mixture was stirred at 140 °C for 12 h. The mixture was poured into water (100 mL), and followed by the extraction with ethyl acetate (25 mL × 3). The combined organic layer was dried over anhydrous MgSO<sub>4</sub> and concentrated under vacuum. The residue was added to a mixture of AcOH-H<sub>2</sub>SO<sub>4</sub> (3 mL, V/V = 2: 1). The resulting mixture was stirred at 120 °C for 2 h and then slowly poured into ice-cold water (100 mL). The pH of the solution was adjusted to 7 by adding aqueous NaOH solution (1 M). The solution was extracted with ethyl acetate (20 mL × 3). The combined organic layer was dried over anhydrous MgSO<sub>4</sub> and concentrated under vacuum. The residue was purified by silica gel flash column chromatography to give compound 1.

### 2.2 A typical procedure for the synthesis of 3<sup>[2]</sup>

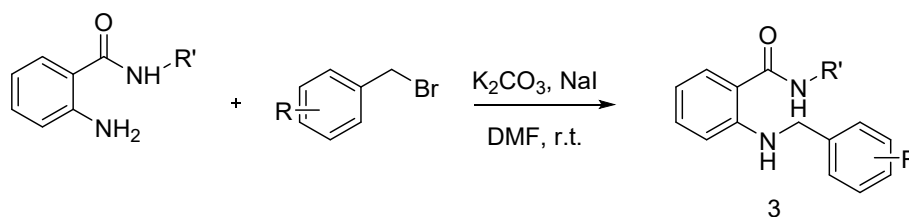

A mixture of 2-aminobenzamide (1.5 mmol),  $K_2CO_3$  (1.5 mmol), NaI (1.5 mmol), and benzyl bromide (2.0 mmol) in DMF (10 mL) was stirred at room temperature for 24 hours. The reaction mixture was poured into water and extracted with EtOAc. The organic layer was washed with brine, dried over  $MgSO_4$ , and concentrated in vacuo. The residue was purified by silica gel flash column chromatography to give compound **3**.

### 3. General procedure for the synthesis of compound **2** or **4** or **6**

The substrate 2-(3,4-dihydroisoquinolin-2(1H)-yl)benzamide **1** or 2-(benzylamino)benzamide **3** (0.5 mmol), or analogue **5**, BME (1 mL) were added to a 10 mL Schlenk tube. The tube was evacuated and filled with oxygen three times. The mixture was stirred at 120 °C for 2 hours under oxygen atmosphere with an  $O_2$  balloon. After cooling, the mixture was subjected to a silica gel column chromatography to isolate product **2** or **4** or **6**.

### 4. Gram-scale synthesis of compound **2a**

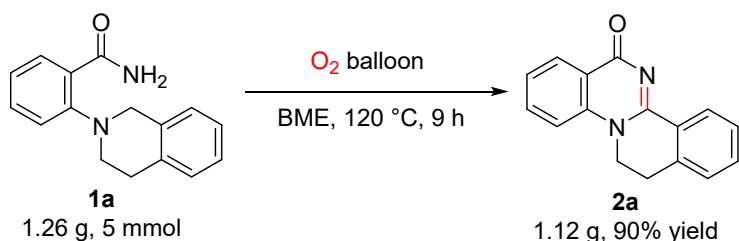

2-(3,4-Dihydroisoquinolin-2-yl)benzamide (**1a**, 1.26 g, 5 mmol) and BME (10 mL) were added to a 25 mL round-bottom flask. The flask was evacuated and filled with oxygen three times. The mixture was stirred at 120 °C for 9 hours under oxygen atmosphere with an  $O_2$  balloon. After cooling, the mixture was subjected to a silica gel column chromatography to isolate product **2a** (1.12 g, 90% yield).

### 5. Control experiments

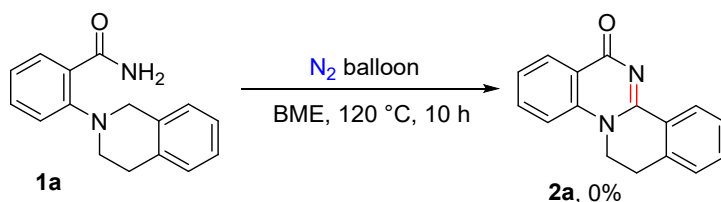

2-(3,4-Dihydroisoquinolin-2(1H)-yl)benzamide **1a** (0.3 mmol) and BME (1 mL) were added to a 10 mL Schlenk tube. The tube was evacuated and filled with nitrogen three times. The mixture was stirred at 120 °C for 10 hours under nitrogen atmosphere with a  $N_2$  balloon. After cooling, the product **2a** was not detected.

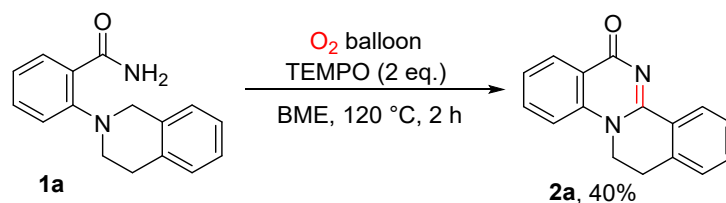

2-(3,4-Dihydroisoquinolin-2(1H)-yl)benzamide **1a** (0.3 mmol), BME (1 mL), and 2,2,6,6-tetramethylpiperidine-*N*-oxyl (TEMPO, 0.6 mmol) were added to a 10 mL Schlenk tube. The tube was evacuated and filled with oxygen three times. The mixture was stirred at 120 °C for 2 hours under oxygen atmosphere with an O<sub>2</sub> balloon. After cooling, the mixture was subjected to silica gel column chromatography to isolate product **2a** (30 mg, 40%).

## 6. Analytical data of the products

### 12,13-dihydro-6H-isoquinolino[2,1-*a*]quinazolin-6-one (**2a**)<sup>[1]</sup>

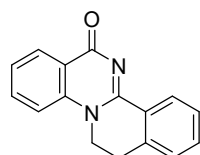

94% yield (117 mg). <sup>1</sup>H NMR (400 MHz, CDCl<sub>3</sub>): δ = 8.53 (dd, *J*<sub>1</sub> = 7.6 Hz, *J*<sub>2</sub> = 1.2 Hz, 1H), 8.38 (dd, *J*<sub>1</sub> = 7.6 Hz, *J*<sub>2</sub> = 1.6 Hz, 1H), 7.77-7.70 (m, 1H), 7.57-7.37 (m, 4H), 7.28 (dd, *J*<sub>1</sub> = 7.2 Hz, *J*<sub>2</sub> = 1.2 Hz, 1H), 4.35 (t, *J* = 6.8 Hz, 2H), 3.25 (t, *J* = 6.4 Hz, 2H). <sup>13</sup>C NMR (100 MHz, CDCl<sub>3</sub>): δ = 169.94, 155.57, 141.20, 136.27, 134.29, 133.22, 130.04, 129.56, 129.31, 128.29, 127.48, 126.33, 120.85, 114.40, 43.77, 27.59.

### 7-methoxy-12,13-dihydro-6H-isoquinolino[2,1-*a*]quinazolin-6-one (**2b**)

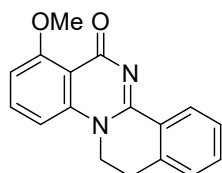

82% yield (114 mg). <sup>1</sup>H NMR (400 MHz, CDCl<sub>3</sub>): δ = 8.37 (dd, *J*<sub>1</sub> = 8.0 Hz, *J*<sub>2</sub> = 1.5 Hz, 1H), 7.51 (t, *J* = 8.4 Hz, 1H), 7.42-7.36 (m, 1H), 7.28 (t, *J* = 8.0 Hz, 1H), 7.21 (d, *J* = 7.2 Hz, 1H), 7.01 (d, *J* = 8.4 Hz, 1H), 6.80 (d, *J* = 8.4 Hz, 1H), 4.19 (t, *J* = 6.8 Hz, 2H), 3.93 (s, 3H), 3.19 (t, *J* = 6.8 Hz, 2H). <sup>13</sup>C NMR (100 MHz, CDCl<sub>3</sub>): δ = 167.84, 160.68, 153.60, 143.27, 135.79, 133.91, 132.34, 129.11, 128.94, 127.48, 126.83, 110.34, 107.14, 105.61, 56.40, 43.95, 27.04. HRMS (ESI) calcd. for C<sub>17</sub>H<sub>15</sub>N<sub>2</sub>O<sub>2</sub> ([M+H]<sup>+</sup>): 279.1134, Found: 279.1140.

### 9-methyl-12,13-dihydro-6H-isoquinolino[2,1-*a*]quinazolin-6-one (**2c**)<sup>[1]</sup>

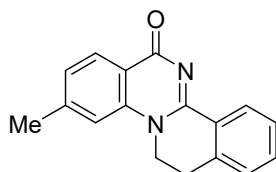

82% yield (108 mg). <sup>1</sup>H NMR (400 MHz, CDCl<sub>3</sub>): δ = 8.49 (dd, *J*<sub>1</sub> = 8.0 Hz, *J*<sub>2</sub> = 1.6 Hz, 1H), 8.22 (d, *J* = 8.0 Hz, 1H), 7.48 (dt, *J* = 7.6, 1.2 Hz, 1H), 7.38-7.20 (m, 4H), 4.32 (t, *J* = 6.8 Hz, 2H), 3.25 (t, *J* = 6.4 Hz, 2H), 2.51 (s, 3H). <sup>13</sup>C NMR (100 MHz, CDCl<sub>3</sub>): δ = 169.43, 154.85, 144.82, 140.77, 135.83, 132.60, 129.48, 129.11, 128.58, 127.67, 127.19, 126.99, 118.08, 113.99, 43.19, 27.08, 22.42.

**8-(trifluoromethyl)-12,13-dihydro-6H-isoquinolino[2,1-*a*]quinazolin-6-one (2d)** [1]

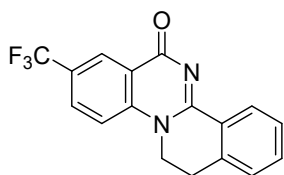

77% yield (122 mg).  $^1\text{H NMR}$  (400 MHz,  $\text{CDCl}_3$ ):  $\delta$  = 8.75 (s, 1H), 8.65 (d,  $J$  = 7.6 Hz, 1H), 8.00 (d,  $J$  = 8.8 Hz, 1H), 7.70 (d,  $J$  = 8.8 Hz, 1H), 7.60 (d,  $J$  = 7.6 Hz, 1H), 7.47 (t,  $J$  = 7.6 Hz, 1H), 7.36 (d,  $J$  = 7.6 Hz, 1H), 4.43 (t,  $J$  = 6.8 Hz, 2H), 3.35 (t,  $J$  = 6.8 Hz, 2H).  $^{13}\text{C NMR}$  (100 MHz,  $\text{CDCl}_3$ ):  $\delta$  = 168.34, 155.98, 142.89, 135.82, 133.26, 130.11 (q,  $J$  = 3.3 Hz), 129.91, 128.71, 128.05, 127.79, 127.10, 126.90 (q,  $J$  = 3.8 Hz), 126.87 (q,  $J$  = 270.3 Hz), 120.27, 114.75, 43.70, 27.11.

**7-fluoro-12,13-dihydro-6H-isoquinolino[2,1-*a*]quinazolin-6-one (2e)**

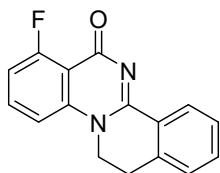

80% yield (107 mg).  $^1\text{H NMR}$  (400 MHz,  $\text{CDCl}_3$ ):  $\delta$  = 8.48 (d,  $J$  = 8.0 Hz, 1H), 7.70-7.65 (m, 1H), 7.52 (t,  $J$  = 7.2 Hz, 1H), 7.39-7.29 (m, 3H), 7.15-7.06 (m, 1H), 4.34 (t,  $J$  = 6.8 Hz, 2H), 3.31 (t,  $J$  = 6.8 Hz, 2H).  $^{13}\text{C NMR}$  (100 MHz,  $\text{CDCl}_3$ ):  $\delta$  = 160.75, 154.73, 142.89, 135.80, 134.12 (d,  $J$  = 11.0 Hz), 132.88, 129.54, 128.87 (d,  $J$  = 35.9 Hz), 127.8, 126.98, 126.14, 122.46, 112.76 (d,  $J$  = 21.0 Hz), 109.69, 44.10, 27.07.

**HRMS** (ESI) calcd. for  $\text{C}_{16}\text{H}_{12}\text{FN}_2\text{O}$  ( $[\text{M}+\text{H}]^+$ ): 267.0934, Found: 267.0938.

**9-fluoro-12,13-dihydro-6H-isoquinolino[2,1-*a*]quinazolin-6-one (2f)**

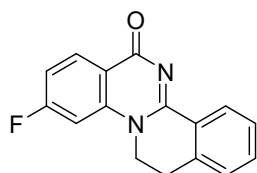

79% yield (105 mg).  $^1\text{H NMR}$  (400 MHz,  $\text{CDCl}_3$ ):  $\delta$  = 8.27-8.12 (m, 2H), 7.54 (t,  $J$  = 7.2 Hz, 1H), 7.46-.40 (m, 2H), 7.34-7.29 (m, 2H), 4.08 (t,  $J$  = 6.8 Hz, 2H), 3.21 (t,  $J$  = 6.8 Hz, 2H).  $^{13}\text{C NMR}$  (100 MHz,  $\text{CDCl}_3$ ):  $\delta$  = 164.36, 164.13, 161.85 (d,  $J$  = 246.4 Hz), 147.72 (d,  $J$  = 11.7 Hz), 138.21, 132.67, 132.48 (d,  $J$  = 3.2 Hz), 129.09, 128.99, 127.46, 127.11, 119.88 (d,  $J$  = 2.9 Hz), 117.07 (d,  $J$  = 12.0 Hz), 112.84 (d,  $J$  = 28.0 Hz), 48.93, 28.42. **HRMS** (ESI) calcd. for  $\text{C}_{16}\text{H}_{12}\text{FN}_2\text{O}$  ( $[\text{M}+\text{H}]^+$ ): 267.0934, Found: 267.0940.

**8-fluoro-12,13-dihydro-6H-isoquinolino[2,1-*a*]quinazolin-6-one (2g)**

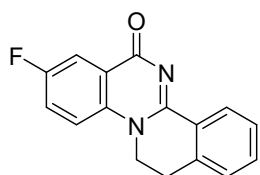

80% yield (107 mg).  $^1\text{H NMR}$  (400 MHz,  $\text{CDCl}_3$ ):  $\delta$  = 8.59 (d,  $J$  = 8.0 Hz, 1H), 8.11 (d,  $J$  = 8.4 Hz, 1H), 7.61-7.43 (m, 4H), 7.33 (d,  $J$  = 7.6 Hz, 1H), 4.38 (t,  $J$  = 6.8 Hz, 2H), 3.30 (t,  $J$  = 6.8 Hz, 2H).  $^{13}\text{C NMR}$  (100 MHz,  $\text{CDCl}_3$ ):  $\delta$  = 168.56, 161.45 (d,  $J$  = 249.1 Hz), 155.04, 137.27, 135.54, 132.86, 129.76, 128.95, 127.98, 126.95, 122.30 (d,  $J$  = 7.0 Hz), 121.83 (d,  $J$  = 24.4 Hz), 116.14 (d,

$J = 7.7$  Hz), 114.19 (d,  $J = 22.6$  Hz), 43.63, 27.12 **HRMS** (ESI) calcd. for  $C_{16}H_{12}FN_2O$  ( $[M+H]^+$ ): 267.0934, Found: 267.0940.

**8-chloro-12,13-dihydro-6H-isoquinolino[2,1-*a*]quinazolin-6-one (2h)** <sup>[3]</sup>

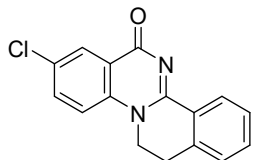

76% yield (107 mg). **<sup>1</sup>H NMR** (400 MHz,  $CDCl_3$ ):  $\delta = 8.58$  (d,  $J = 8.0$  Hz, 1H), 8.42 (d,  $J = 2.8$  Hz, 1H), 7.72 (dd,  $J_1 = 8.8$  Hz,  $J_2 = 2.4$  Hz, 1H), 7.62-7.51 (m, 2H), 7.46 (t,  $J = 8.0$  Hz, 1H), 7.34 (d,  $J = 7.2$  Hz, 1H), 4.38 (t,  $J = 6.8$  Hz, 2H), 3.32 (t,  $J = 6.8$  Hz, 2H). **<sup>13</sup>C NMR** (100 MHz,  $CDCl_3$ ):  $\delta = 168.17, 155.24, 139.27, 135.69, 133.91, 133.83, 132.98, 131.90, 129.81, 128.42, 128.00, 127.03, 121.63, 115.66, 43.56, 27.11$ .

**7-bromo-12,13-dihydro-6H-isoquinolino[2,1-*a*]quinazolin-6-one (2i)**

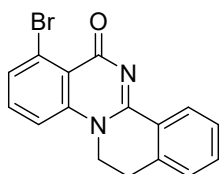

79% yield (129 mg). **<sup>1</sup>H NMR** (400 MHz,  $CDCl_3$ ):  $\delta = 8.46$  (dd,  $J = 8.0, 1.6$  Hz, 1H), 7.73-7.71 (m, 1H), 7.52-7.47 (m, 2H), 7.44 (t,  $J = 7.6$  Hz, 1H), 7.34 (d,  $J = 7.6, 2H$ ), 4.31 (t,  $J = 6.8$  Hz, 2H), 3.31 (t,  $J = 6.4$  Hz, 2H). **<sup>13</sup>C NMR** (100 MHz,  $CDCl_3$ ):  $\delta = 168.73, 155.47, 141.71, 135.75, 133.05, 130.59, 129.81, 129.24, 128.86, 128.73, 127.98, 127.08, 119.13, 117.17, 43.57, 27.10$ . **HRMS** (ESI) calcd. for  $C_{16}H_{12}BrN_2O$  ( $[M+H]^+$ ): 327.0133, Found: 327.0139.

**9-bromo-12,13-dihydro-6H-isoquinolino[2,1-*a*]quinazolin-6-one (2j)** <sup>[1]</sup>

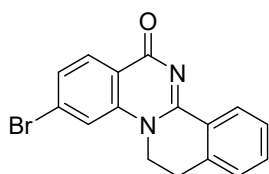

82% yield (134 mg). **<sup>1</sup>H NMR** (400 MHz,  $CDCl_3$ ):  $\delta = 8.57$  (dd,  $J = 8.0, 1.2$  Hz, 1H), 8.29 (d,  $J = 8.4$  Hz, 1H), 7.76 (d,  $J = 1.6$  Hz, 1H), 7.60 (dd,  $J = 8.4, 1.6$  Hz, 1H), 7.56 (dt,  $J = 7.6, 1.6$  Hz, 1H), 7.45 (t,  $J = 8.0$  Hz, 1H), 7.34 (d,  $J = 7.6$  Hz, 1H), 4.34 (t,  $J = 6.8$  Hz, 2H), 3.31 (t,  $J = 6.8$  Hz, 2H). **<sup>13</sup>C NMR** (100 MHz,  $CDCl_3$ ):  $\delta = 168.72, 155.45, 141.69, 135.74, 133.04, 130.58, 129.79, 129.23, 128.84, 128.72, 127.97, 127.06, 119.12, 117.15, 43.56, 27.09$ .

**3-bromo-12,13-dihydro-6H-isoquinolino[2,1-*a*]quinazolin-6-one (2k)**

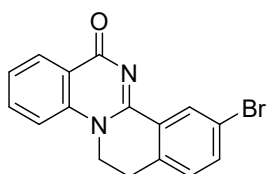

84% yield (137 mg). **<sup>1</sup>H NMR** (400 MHz,  $CDCl_3$ ):  $\delta = 8.71$  (d,  $J = 2.0$  Hz, 1H), 8.39 (dd,  $J_1 = 8.0$  Hz,  $J_2 = 2.0$  Hz, 1H), 7.82-7.75 (m, 1H), 7.66-7.45 (m, 3H), 7.20 (d,  $J = 8.0$  Hz, 1H), 4.38 (t,  $J = 6.8$  Hz, 2H), 3.27 (t,  $J = 6.8$  Hz, 2H). **<sup>13</sup>C NMR** (100 MHz,  $CDCl_3$ ): 170.02, 154.60, 141.41, 136.46, 135.38, 134.81, 133.05, 131.65, 129.84, 129.50, 127.02, 122.64, 121.28, 114.80, 43.97, 27.54. **HRMS** (ESI) calcd. for  $C_{16}H_{12}BrN_2O$  ( $[M+H]^+$ ): 327.0133, Found: 327.0130.

### 2-phenylquinazolin-4(3H)-one (4a) [4]

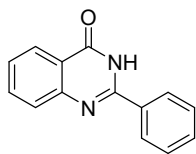

65% yield (72 mg). <sup>1</sup>H NMR (400 MHz, DMSO-*d*<sub>6</sub>): δ = 12.55 (s, 1H), 8.24 – 8.14 (m, 3H), 7.86-7.84 (m, 1H), 7.76 (dd, *J*<sub>1</sub> = 8.0 Hz, *J*<sub>2</sub> = 0.8 Hz, 1H), 7.63 – 7.50 (m, 4H). <sup>13</sup>C NMR (100 MHz, DMSO-*d*<sub>6</sub>): δ = 162.97, 153.04, 149.45, 135.35, 133.43, 132.14, 129.34, 128.49, 128.23, 127.33, 126.58, 121.69.

### 2-(p-tolyl)quinazolin-4(3H)-one (4b) [4]

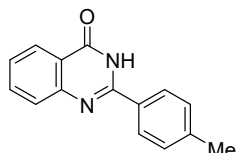

67% yield (79 mg). <sup>1</sup>H NMR (400 MHz, DMSO-*d*<sub>6</sub>): δ = 12.40 (s, 1H), 8.03 (dd, *J*<sub>1</sub> = 20.4 Hz, *J*<sub>2</sub> = 7.6 Hz, 3H), 7.78-7.70 (m, 1H), 7.64 (d, *J* = 8.4 Hz, 1H), 7.47-7.38 (m, 1H), 7.27 (d, *J* = 8.0 Hz, 2H), 2.30 (s, 3H); <sup>13</sup>C NMR (100 MHz, DMSO-*d*<sub>6</sub>): δ = 162.11, 152.06, 148.66, 141.31, 134.45, 129.71, 129.05, 127.52, 127.26, 126.27, 125.68, 120.72, 20.85.

### 2-(3-methoxyphenyl)quinazolin-4(3H)-one (4c) [5]

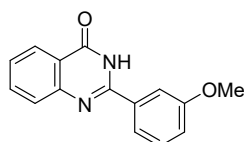

71% yield (90 mg). <sup>1</sup>H NMR (400 MHz, DMSO-*d*<sub>6</sub>): δ = 12.56 (s, 1H), 8.17 (dd, *J*<sub>1</sub> = 8.0 Hz, *J*<sub>2</sub> = 1.6 Hz, 1H), 7.90-7.71 (m, 4H), 7.59-7.42 (m, 2H), 7.16 (dd, *J*<sub>1</sub> = 8.0 Hz, *J*<sub>2</sub> = 2.4 Hz, 1H), 3.88 (s, 3H); <sup>13</sup>C NMR (100 MHz, DMSO-*d*<sub>6</sub>): δ = 163.10, 160.18, 152.89, 135.49, 134.86, 130.61, 128.39, 127.50, 126.71, 121.85, 120.97, 118.46, 113.35, 56.24.

### 2-(3,5-dimethoxyphenyl)quinazolin-4(3H)-one (4d) [6]

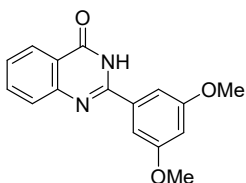

67% yield (95 mg). <sup>1</sup>H NMR (400 MHz, DMSO-*d*<sub>6</sub>): δ = 12.54 (s, 1H), 8.16 (dd, *J*<sub>1</sub> = 8.0 Hz, *J*<sub>2</sub> = 1.2 Hz, 1H), 7.88-7.80 (m, 1H), 7.76 (dd, *J*<sub>1</sub> = 8.4 Hz, *J*<sub>2</sub> = 1.2 Hz, 1H), 7.57-7.50 (m, 1H), 7.39 (d, *J* = 2.4 Hz, 2H), 6.70 (t, *J* = 2.0 Hz, 1H), 3.85 (s, 6H); <sup>13</sup>C NMR (100 MHz, DMSO-*d*<sub>6</sub>): δ = 162.88, 161.13, 161.13, 152.47, 135.25, 135.17, 128.21, 127.31, 126.50, 121.69, 106.11, 104.40, 56.17.

### 2-(3,5-dimethylphenyl)quinazolin-4(3H)-one (4e) [7]

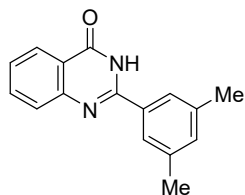

65% yield (81 mg). <sup>1</sup>H NMR (400 MHz, DMSO-*d*<sub>6</sub>): δ = 12.46 (s, 1H), 8.19 (dd, *J*<sub>1</sub> = 8.0 Hz, *J*<sub>2</sub> = 1.6 Hz, 1H), 7.90-7.82 (m, 3H), 7.78 (dd, *J*<sub>1</sub> = 8.4 Hz, *J*<sub>2</sub> = 1.2 Hz, 1H), 7.58-7.52 (m, 1H), 7.26 (s, 1H), 2.40 (s, 6H); <sup>13</sup>C NMR (100 MHz, DMSO-*d*<sub>6</sub>): δ = 162.64, 152.92, 149.25, 138.23, 135.06, 133.21, 133.02, 127.92, 126.96, 126.31, 125.95, 121.43, 21.36.

### 2-(4-(trifluoromethoxy)phenyl)quinazolin-4(3H)-one (4f) [7]

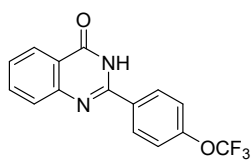

78% yield (119 mg).  $^1\text{H NMR}$  (400 MHz,  $\text{DMSO-}d_6$ ):  $\delta$  = 12.66 (s, 1H), 8.31 (d,  $J$  = 8.8 Hz, 2H), 8.17 (dd,  $J_1$  = 8.0 Hz,  $J_2$  = 1.6 Hz, 1H), 7.90-7.84 (m, 1H), 7.76 (dd,  $J_1$  = 8.4 Hz,  $J_2$  = 1.2 Hz, 1H), 7.61-7.52 (m, 3H);

$^{13}\text{C NMR}$  (100 MHz,  $\text{DMSO-}d_6$ ):  $\delta$  = 172.97, 151.68, 138.60, 135.12, 130.54, 130.07, 127.91, 127.26, 126.31, 121.42, 121.32, 113.20, 92.53.

### 2-(4-fluorophenyl)quinazolin-4(3H)-one (4g) [4]

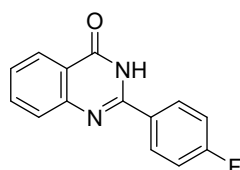

65% yield (78 mg).  $^1\text{H NMR}$  (400 MHz,  $\text{DMSO-}d_6$ ):  $\delta$  = 12.59 (s, 1H), 8.31-8.22 (m, 2H), 8.16 (dd,  $J_1$  = 8.0 Hz,  $J_2$  = 1.6 Hz, 1H), 7.89-7.81 (m, 1H), 7.74 (dd,  $J_1$  = 8.0 Hz,  $J_2$  = 1.2 Hz, 1H), 7.56-7.49 (m, 1H), 7.40 (t,

$J$  = 8.8 Hz, 2H);  $^{13}\text{C NMR}$  (100 MHz,  $\text{DMSO-}d_6$ ):  $\delta$  = 165.75 (d,  $J$  = 247.8 Hz), 162.67, 151.83, 149.12, 135.12, 130.89 (d,  $J$  = 9.0 Hz), 129.71, 127.94, 127.09, 126.32, 121.36, 116.11 (d,  $J$  = 21.90 Hz).

### 2-(2,5-difluorophenyl)quinazolin-4(3H)-one (4h) [8]

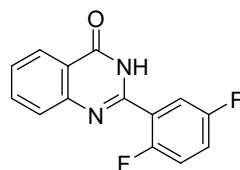

74% yield (96 mg).  $^1\text{H NMR}$  (400 MHz,  $\text{DMSO-}d_6$ ):  $\delta$  = 12.67 (s, 1H), 8.19 (dd,  $J_1$  = 8.0 Hz,  $J_2$  = 1.2 Hz, 1H), 7.92-7.83 (m, 1H), 7.75 (d,  $J$  = 8.0 Hz, 1H), 7.69-7.55 (m, 2H), 7.52-7.44 (m, 2H);  $^{13}\text{C NMR}$  (100 MHz,

$\text{DMSO-}d_6$ ):  $\delta$  = 161.73, 159.25 (d,  $J$  = 241.8 Hz), 157.32 (d,  $J$  = 247.5 Hz), 149.09, 148.77, 135.00, 127.88, 127.60, 126.19, 123.81 (dd,  $J_1$  = 15.8 Hz,  $J_2$  = 8.5 Hz), 121.52, 119.64 (dd,  $J_1$  = 23.7 Hz,  $J_2$  = 8.8 Hz), 118.33 (dd,  $J_1$  = 24.4 Hz,  $J_2$  = 8.9 Hz), 117.67 (dd,  $J_1$  = 25.8 Hz,  $J_2$  = 2.8 Hz).

### 3-methyl-2-phenylquinazolin-4(3H)-one (4i) [4]

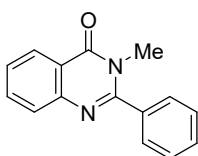

66% yield (78 mg).  $^1\text{H NMR}$  (400 MHz,  $\text{CDCl}_3$ ):  $\delta$  = 8.39 (d,  $J$  = 8.0 Hz, 1H), 7.80 (s, 2H), 7.67-7.54 (m, 6H), 3.56 (s, 1H);  $^{13}\text{C NMR}$  (100 MHz,  $\text{CDCl}_3$ ):  $\delta$  = 162.66, 156.08, 147.27, 135.35, 134.26, 130.03, 128.84, 127.96, 127.44, 126.95,

126.63, 120.48, 34.23.

### 2-(3,5-dimethoxyphenyl)-3-methylquinazolin-4(3H)-one (4j) [9]

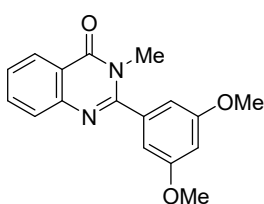

72% yield (107 mg).  $^1\text{H NMR}$  (400 MHz,  $\text{DMSO-}d_6$ ):  $\delta$  = 8.21 (dd,  $J_1$  = 8.0 Hz,  $J_2$  = 1.6 Hz, 1H), 7.90-7.83 (m, 1H), 7.70 (dt,  $J_1$  = 8.4 Hz,  $J_2$  = 0.8 Hz, 1H), 7.62-7.56 (m, 1H), 6.84 (d,  $J$  = 2.4 Hz, 2H), 6.70 (t,  $J$  = 2.4 Hz, 1H), 3.83 (s, 6H), 3.39 (s, 3H).  $^{13}\text{C NMR}$  (100 MHz,  $\text{DMSO-}$



$d_6$ ):  $\delta = 162.06, 160.92, 156.36, 147.49, 137.66, 134.87, 127.70, 127.44, 126.59, 120.76, 106.70, 102.03, 56.03, 34.19$ .

#### 2-(3,5-dimethylphenyl)-3-methylquinazolin-4(3H)-one (4k) <sup>[9]</sup>

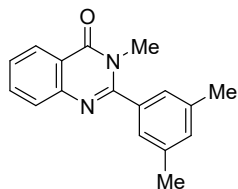

77% yield (102 mg). <sup>1</sup>H NMR (400 MHz, DMSO- $d_6$ ):  $\delta = 8.18$  (dd,  $J_1 = 8.0$  Hz,  $J_2 = 1.2$  Hz, 1H), 7.85-7.81 (m, 1H), 7.66 (dd,  $J_1 = 8.4$  Hz,  $J_2 = 1.2$  Hz, 1H), 7.56-7.50 (m, 1H), 7.26 (s, 2H), 7.18 (s, 1H), 3.37 (s, 5H), 2.39-2.35 (m, 6H); <sup>13</sup>C NMR (100 MHz, DMSO- $d_6$ ):  $\delta = 162.00, 156.65, 147.44,$

138.02, 135.63, 134.66, 131.43, 127.48, 127.13, 126.43, 126.15, 120.44, 34.26, 21.20.

#### 5-fluoro-2-phenylquinazolin-4(3H)-one (4l) <sup>[10]</sup>

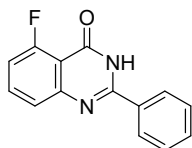

75% yield (90 mg). <sup>1</sup>H NMR (400 MHz, DMSO- $d_6$ ):  $\delta = 12.57$  (s, 1H), 8.17-8.15 (m, 2H), 7.81-7.76 (m, 1H), 7.59-7.52 (m, 4H), 7.27-7.21 (m, 1H). <sup>13</sup>C NMR (100 MHz, DMSO- $d_6$ ):  $\delta = 162.35$  (d,  $J = 261.0$  Hz), 160.12, 153.79,

151.39, 135.61 (d,  $J = 10.7$  Hz), 132.73, 132.19, 129.14, 128.38, 124.08, 113.30 (d,  $J = 20.2$  Hz), 110.96 (d,  $J = 6.1$  Hz).

#### 2-(3,5-dimethoxyphenyl)-6-fluoroquinazolin-4(3H)-one (4m) <sup>[4]</sup>

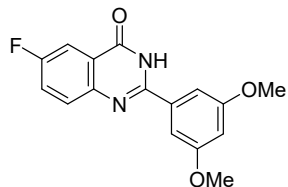

70% yield (105 mg). <sup>1</sup>H NMR (400 MHz, DMSO- $d_6$ ): 12.62 (s, 1H), 7.85-7.81 (m, 2H), 7.75-7.70 (m, 1H), 7.37 (d,  $J = 2.4$  Hz, 2H), 6.70 (t,  $J = 2.0$  Hz, 1H), 3.84 (s, 6H). <sup>13</sup>C NMR (100 MHz, DMSO- $d_6$ ):  $\delta = 161.75$  (d,  $J = 243.9$  Hz), 161.01, 151.92, 145.92, 134.88, 132.19 (d,  $J = 17.5$  Hz), 129.15, 123.69 (d,  $J = 24.1$  Hz), 122.8 (d,  $J = 8.0$  Hz), 111.13 (d,  $J = 23.2$  Hz), 105.99,

104.27, 56.29.

#### 2,3-dihydropyrrolo[1,2-*a*]quinazolin-5(1H)-one (6a) <sup>[1]</sup>

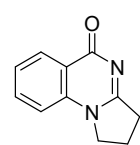

74% yield (69 mg). <sup>1</sup>H NMR (400 MHz, CDCl<sub>3</sub>):  $\delta = 8.30$  (dt,  $J_1 = 8.0$  Hz,  $J_2 = 1.6$  Hz, 1H), 7.75-7.66 (m, 1H), 7.48-7.40 (m, 1H), 7.22 (d,  $J = 8.0$  Hz, 1H), 4.27 (t,  $J = 7.6$  Hz, 2H), 3.20 (t,  $J = 8.4$  Hz, 2H), 2.44 (q,  $J = 8.0$  Hz, 2H). <sup>13</sup>C NMR (100

MHz, CDCl<sub>3</sub>):  $\delta = 170.17, 166.46, 138.66, 133.67, 128.83, 125.88, 118.77, 114.51, 48.75, 32.83, 18.70$ .

#### 5,6-dihydrobenzo[4,5]imidazo[2,1-*a*]isoquinoline (6b) <sup>[4]</sup>

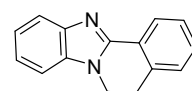

79% yield (87 mg). <sup>1</sup>H NMR (400 MHz, CDCl<sub>3</sub>):  $\delta = 8.35$ -8.34 (m, 1H), 7.93-7.80 (m, 1H), 7.47-7.26 (m, 6H), 4.34 (t,  $J = 8.0$  Hz, 2H), 3.35-3.23 (m, 2H).

$^{13}\text{C}$  NMR (100 MHz,  $\text{CDCl}_3$ ):  $\delta = 149.13, 143.91, 134.67, 134.31, 130.19, 128.12, 127.77, 126.66, 125.67, 122.71, 122.50, 119.76, 109.09, 40.42, 28.26$ .

#### 1,2-diphenyl-1H-benzo[d]imidazole (6c)<sup>[4]</sup>

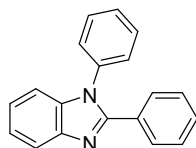

66% yield (89 mg).  $^1\text{H}$  NMR (400 MHz,  $\text{DMSO}-d_6$ ):  $\delta = 7.81-7.79$  (m, 1H), 7.58–7.52 (m, 5H), 7.44-7.26 (m, 7H), 7.20–7.18 (m, 1H).  $^{13}\text{C}$  NMR (100 MHz,  $\text{DMSO}-d_6$ ):  $\delta = 152.50, 143.22, 137.75, 137.13, 130.70, 130.50, 130.19,$

129.79, 129.51, 129.02, 128.19, 124.01, 123.40, 120.06, 111.13.

#### 1-benzyl-2-phenyl-1H-benzo[d]imidazole (6d)<sup>[11]</sup>

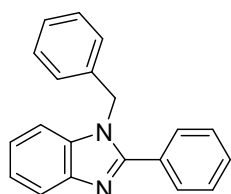

28% yield (39.8 mg).  $^1\text{H}$  NMR (400 MHz,  $\text{CDCl}_3$ ):  $\delta = 7.90$  (d,  $J = 8.0$  Hz, 1H), 7.73-7.71 (m, 2H), 7.51-7.46 (m, 3H), 7.38-7.22 (m, 6H), 7.15-7.12 (m, 2H), 5.48 (s, 2H).  $^{13}\text{C}$  NMR (100 MHz,  $\text{CDCl}_3$ ): 154.19, 143.16, 136.40, 136.06, 130.05, 129.96, 129.28, 129.09, 128.79, 127.80, 125.98,

123.08, 122.72, 120.00, 110.57, 48.40.

#### 12,12',13,13'-tetrahydro-6H,6'H-4b,4'b-bibenzo[4,5][1,3]oxazino[2,3-a]isoquinoline (6e)<sup>[4]</sup>

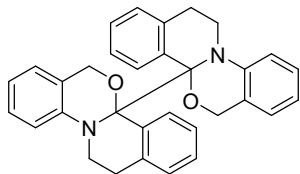

65% yield (154 mg).  $^1\text{H}$  NMR (400 MHz,  $\text{CDCl}_3$ ):  $\delta = 8.16$  (dd,  $J_1 = 7.6$  Hz,  $J_2 = 1.6$  Hz, 2H), 7.61 (dd,  $J_1 = 7.2$  Hz,  $J_2 = 2.4$  Hz, 2H), 7.56-7.51 (m, 2H), 7.44-7.39 (m, 6H), 7.33-7.20 (m, 4H), 4.66 (d,  $J = 11.6$

Hz, 2H), 4.52-4.43 (m, 2H), 4.12-4.01 (m, 2H), 3.91-3.63 (m, 2H), 3.31-3.21 (m, 2H), 3.16-3.05 (m, 2H).  $^{13}\text{C}$  NMR (100 MHz,  $\text{CDCl}_3$ ):  $\delta = 165.74, 141.31, 138.50, 137.76, 132.51, 130.79, 129.41, 129.07, 128.84, 128.34, 127.35, 127.15, 125.97, 61.96, 50.19, 28.59$ .

#### Reference:

- [1]. Sun, Y. Hu, S. Z. Nie, Y. Y. Yan, X. J. Zhang, M. Yan, *Adv. Synth. Catal.*, 2013, **355**, 2179–2184.
- [2]. Hikawa, Y. Ino, H. Suzuki, Y. Yokoyama, *J. Org. Chem.* 2012, **77**, 7046–7051.
- [3]. Q. Y. Li, S. Y. Cheng, H. T. Tang, Y. M. Pan, *Green Chem.*, 2019, **21**, 5517–5520.
- [4]. S. M. Patel, H. Chada, S. Biswal, S. Sharma, D. S. Sharada, *Synthesis* 2019, **51**, 3160–3170.
- [5]. J. K. Laha, K. S. S. Tummalapalli, A. Nair, N. Patel, *J. Org. Chem.* 2015, **80**, 11351–11359.
- [6]. R. Sharma, R. A. Vishwakarma, S. B. Bharate, *Adv. Synth. Catal.* 2016, **358**, 3027–3033.
- [7]. K. Upadhyaya, R. K. Thakur, S. K. Shukla, R. P. Tripathi, *J. Org. Chem.* 2016, **81**, 5046–5055.
- [8]. S. Hao, J. Yang, P. Liu, J. Xu, C. Yang, F. Li, *Org. Lett.* 2021, **23**, 2553–2558.
- [9]. Y. Jang, S. B. Lee, J. Hong, S. Chun, J. Lee, S. Hong, *Org. Biomol. Chem.* 2020, **18**, 5435–5441.
- [10]. H. Hikawa, Y. Ino, H. Suzuki, Y. Yokoyama, *J. Org. Chem.* 2012, **77**, 7046–7051.
- [11]. P. H. Wang, J. Y. Wang, C. T. Au, R.H. Qiu, X. H. Xu, S. F. Yin, *Adv. Synth. Catal.* 2016, **358**, 1302–1308

## 7. NMR spectra

2a

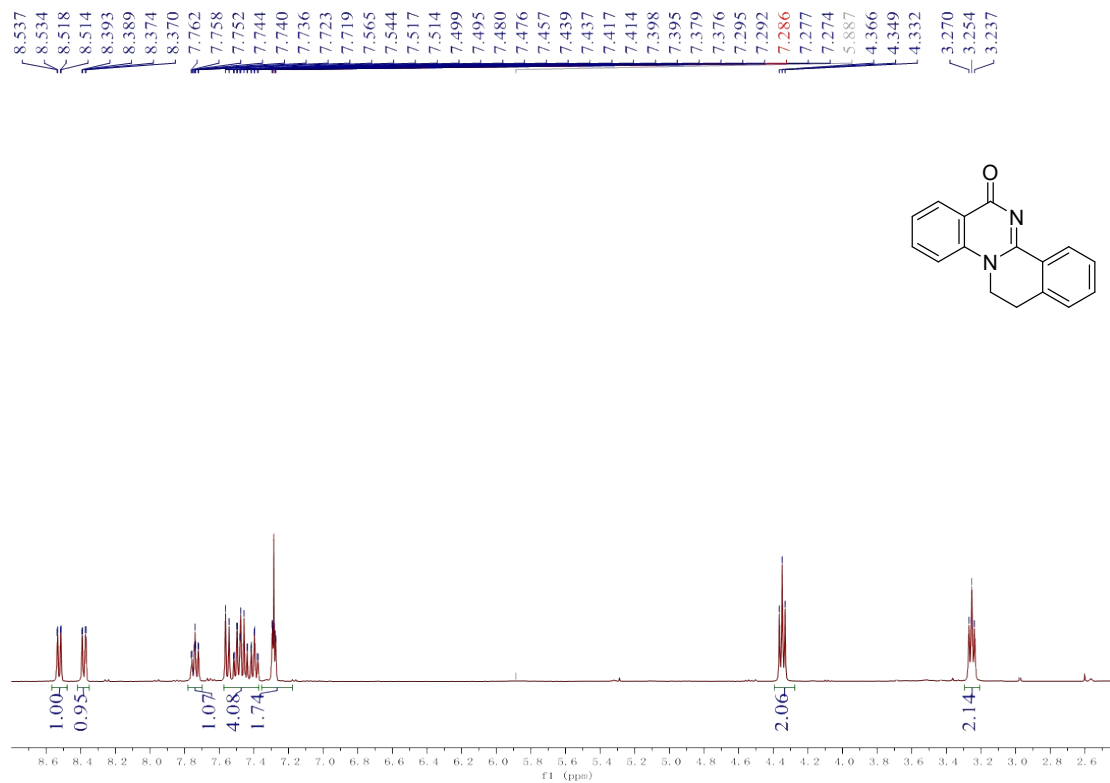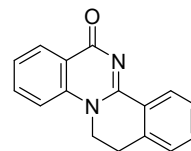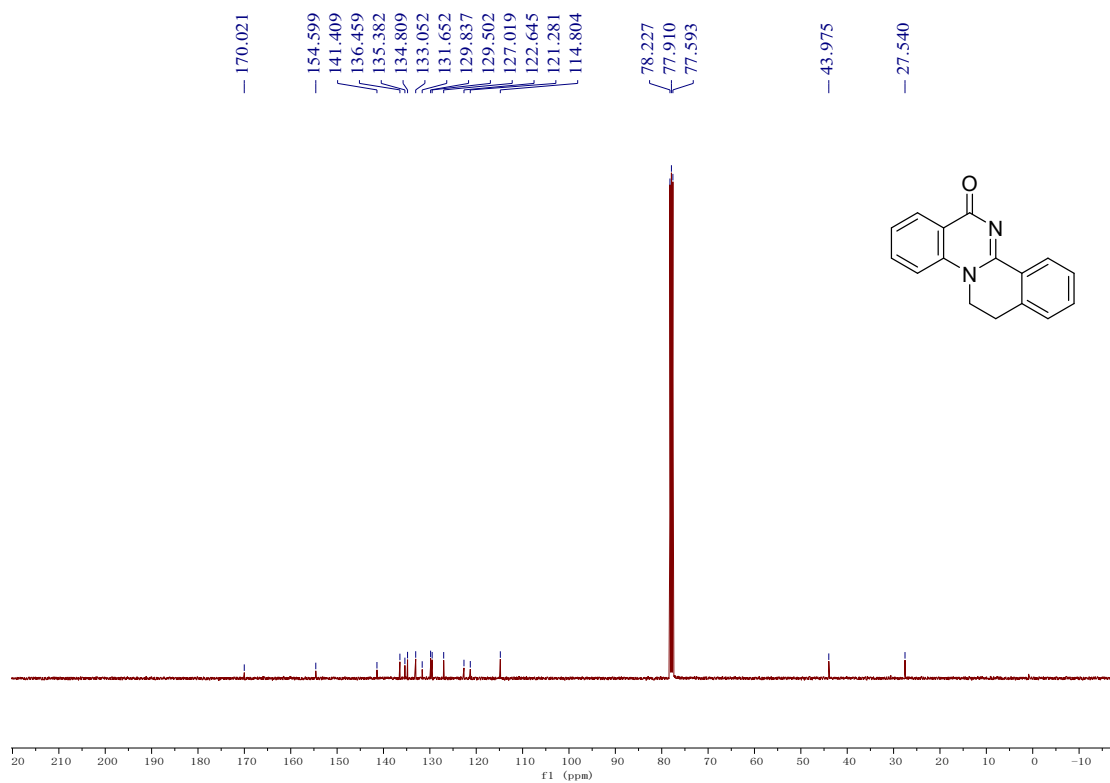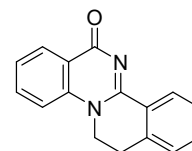

2b

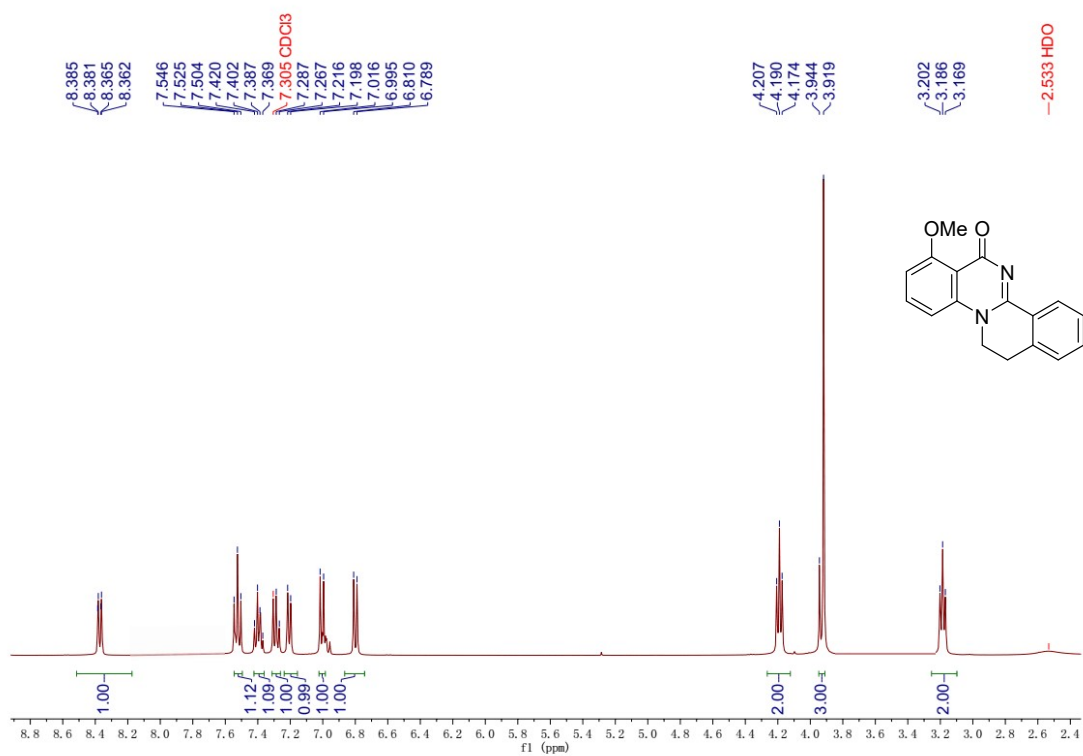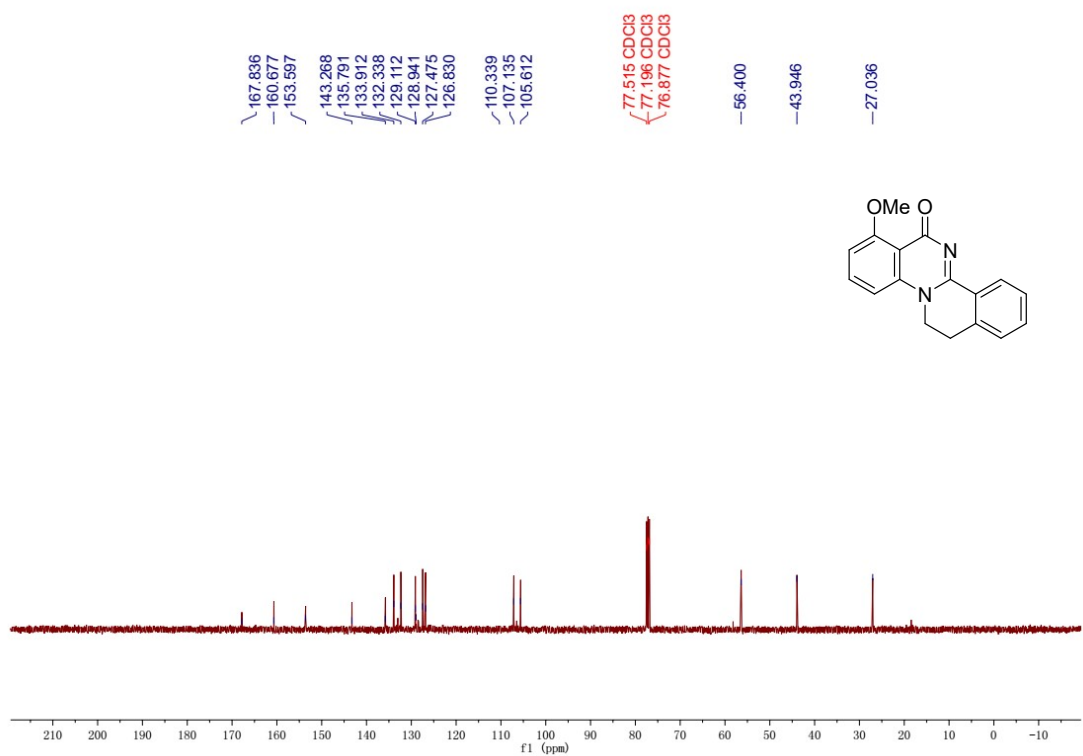

2c

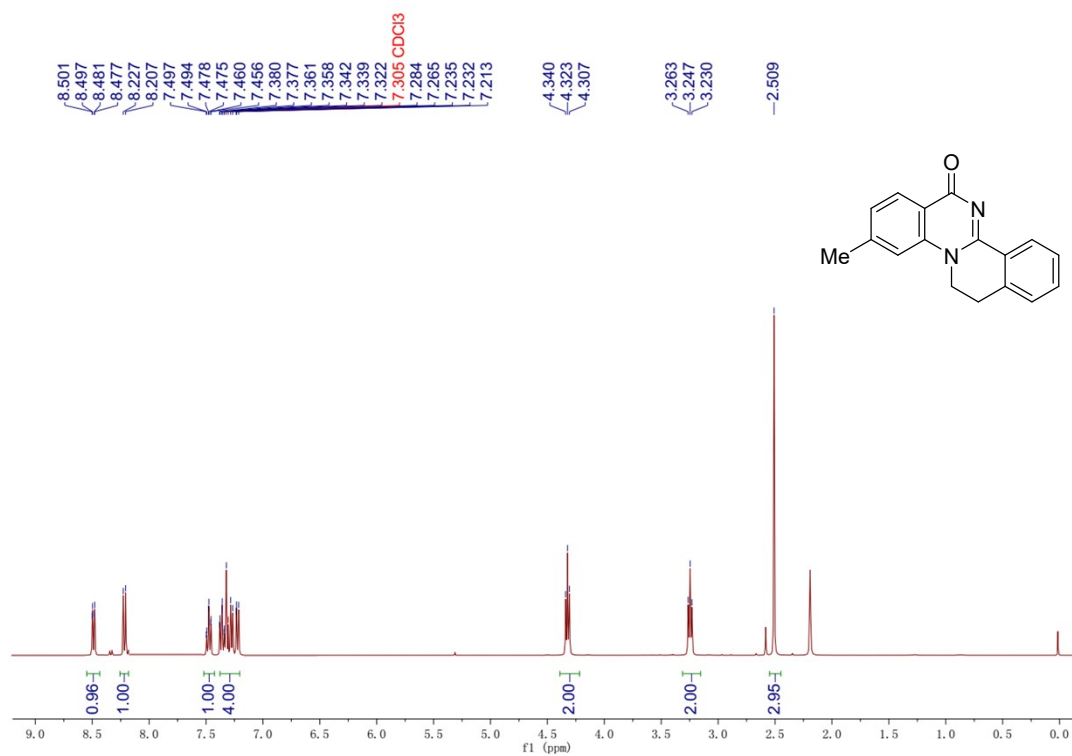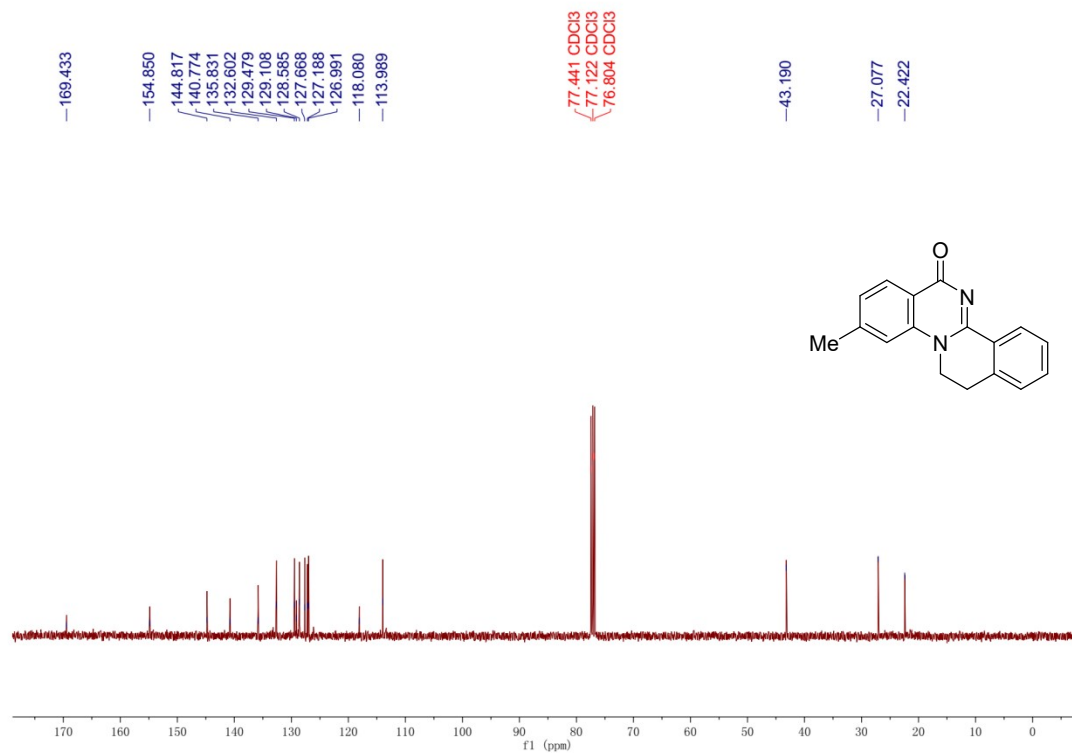

2d

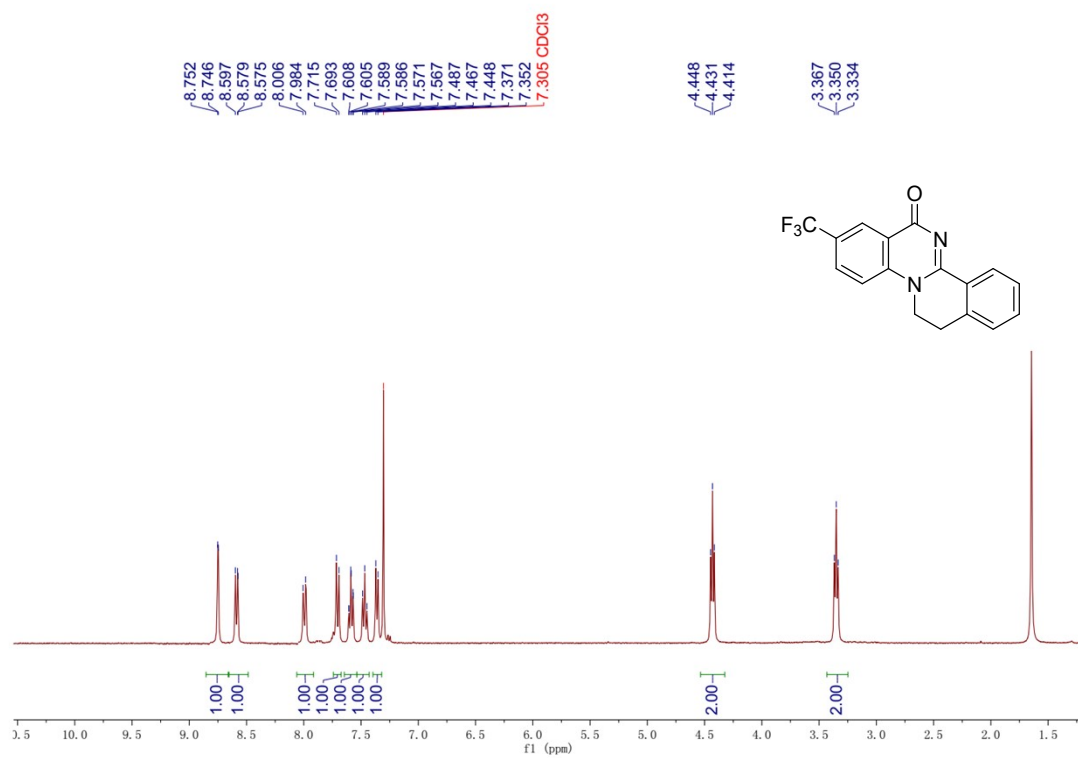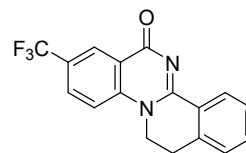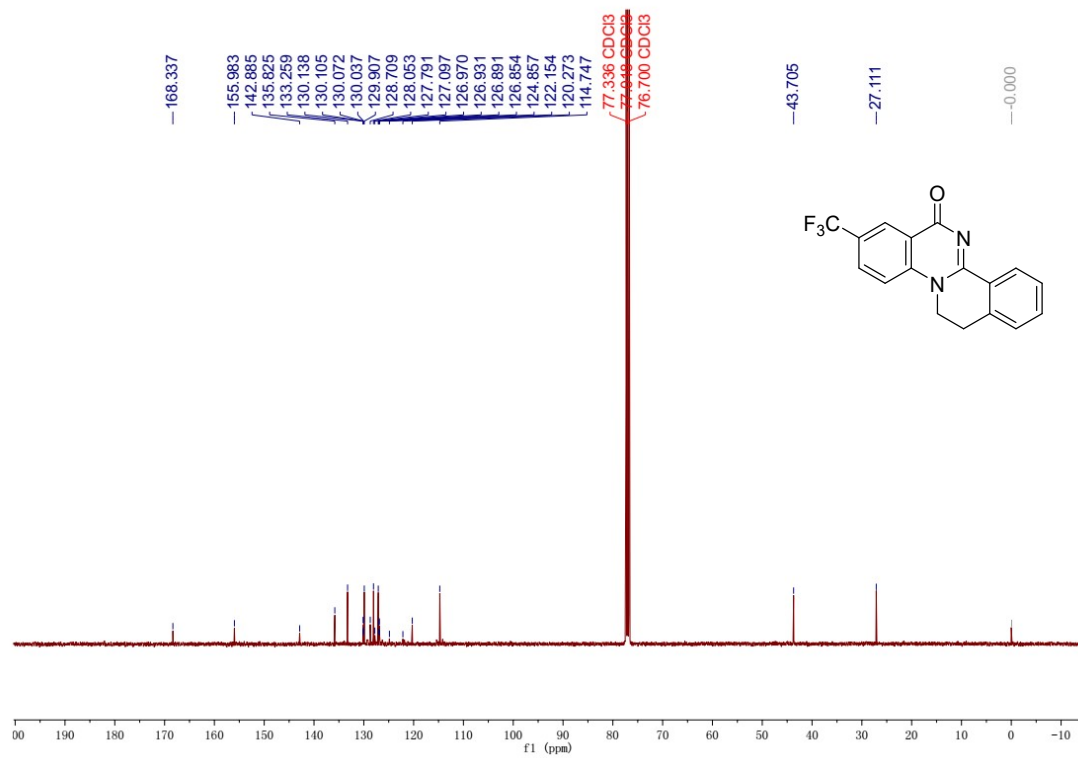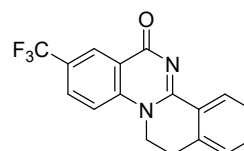

2e

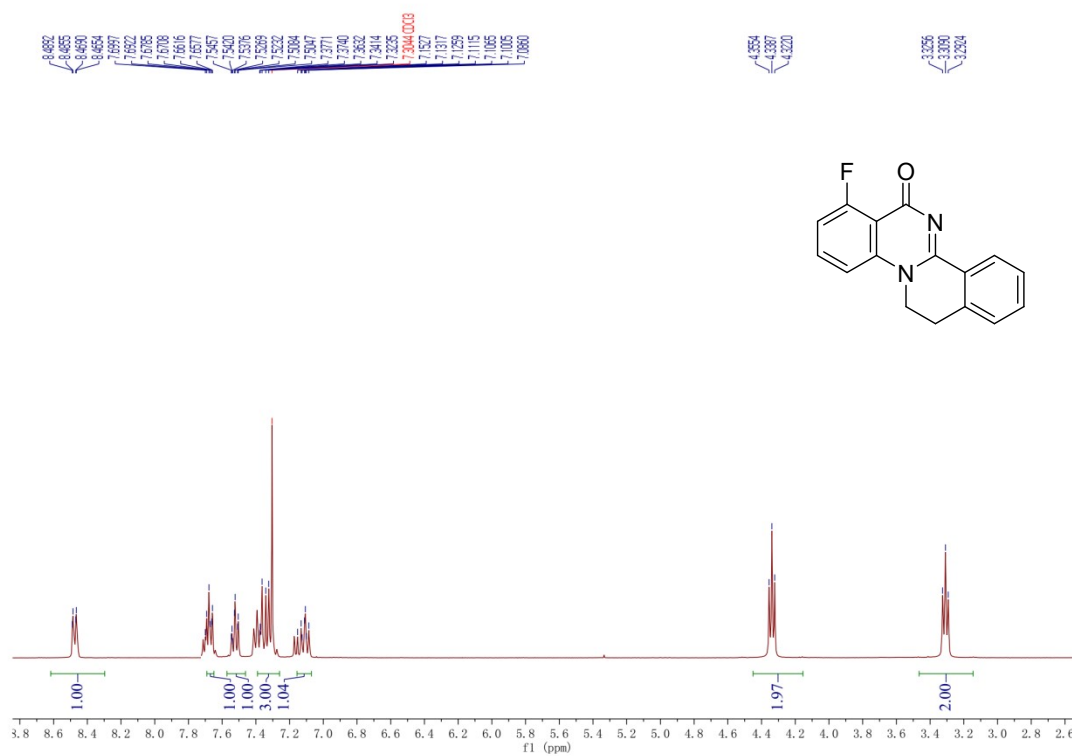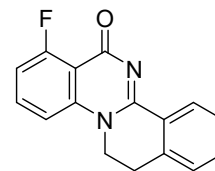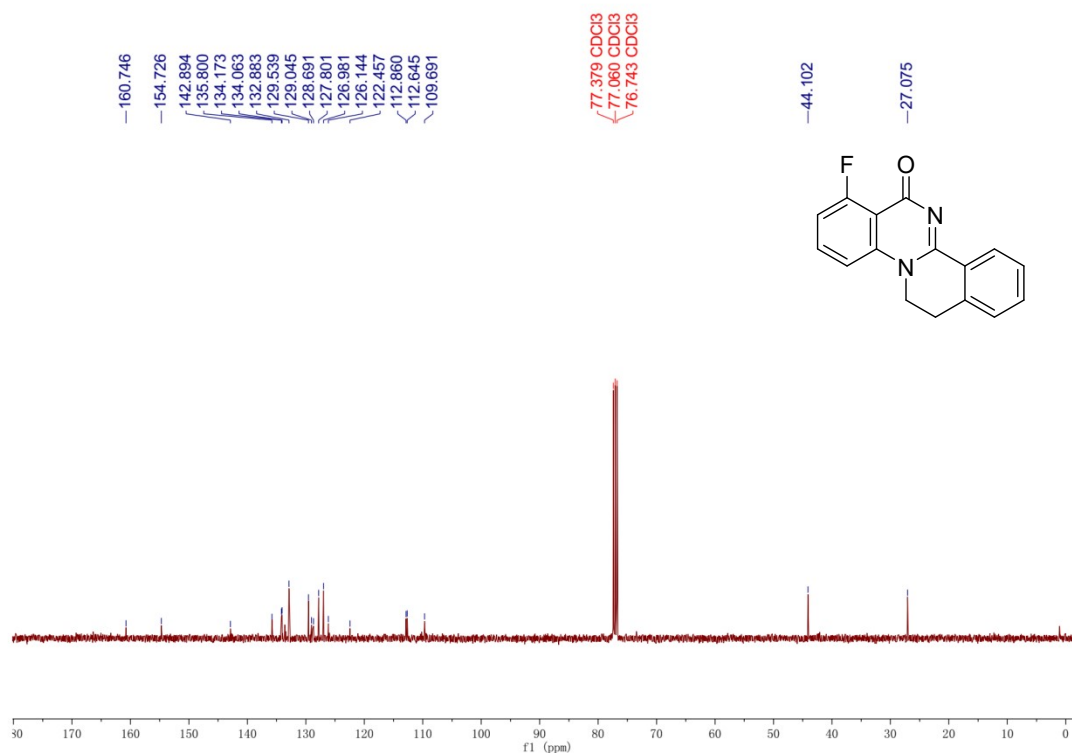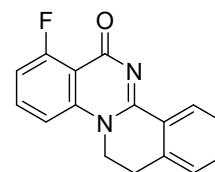

2f

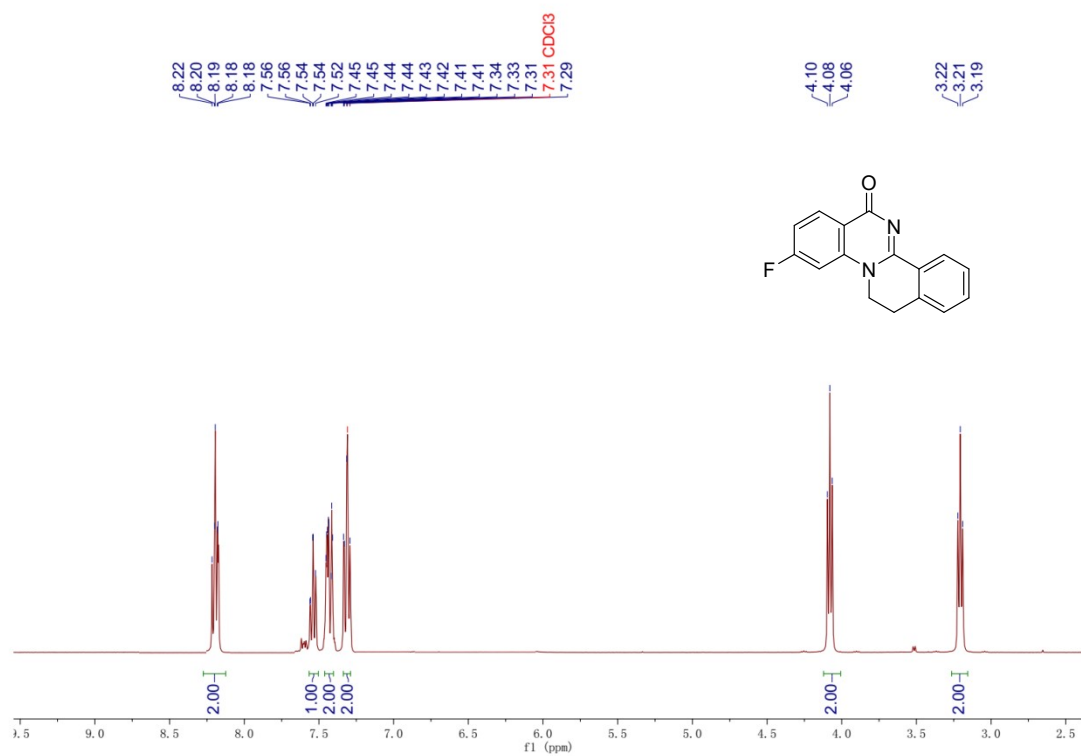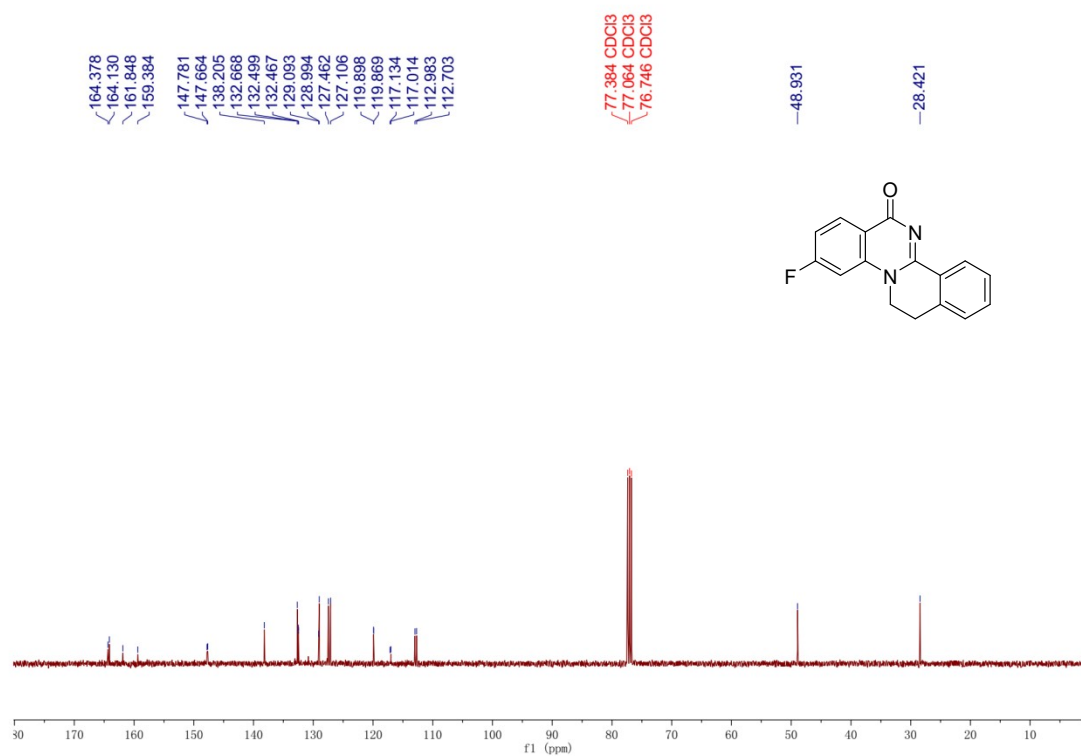



2g

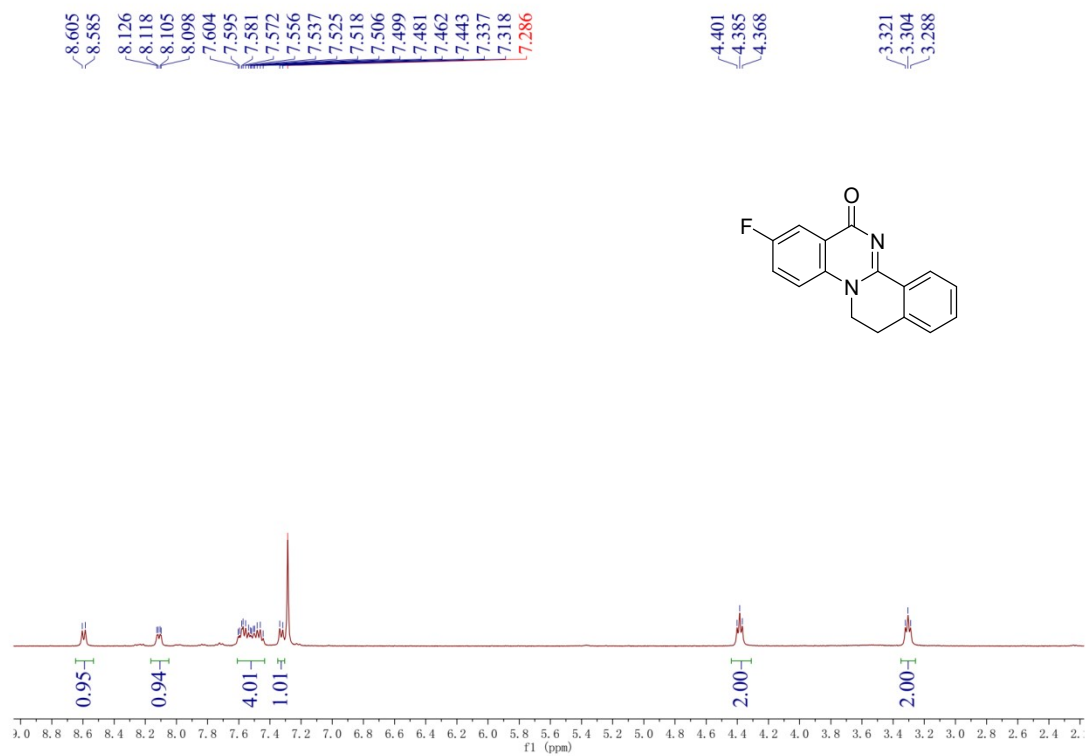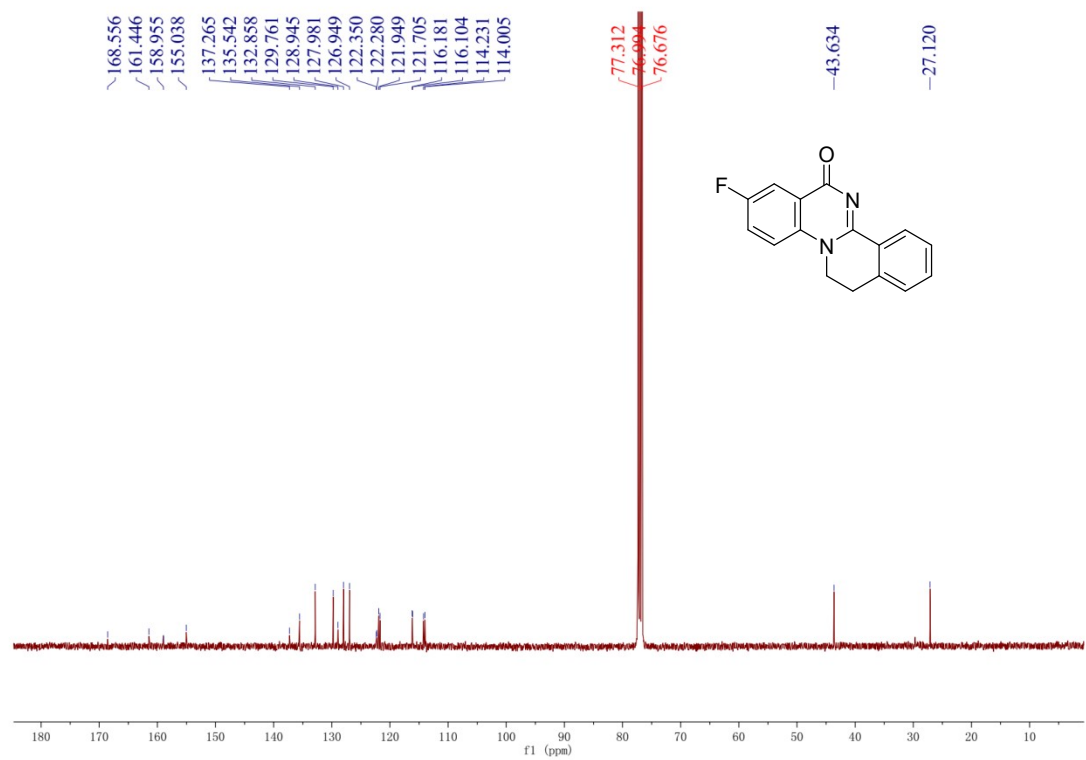

2h

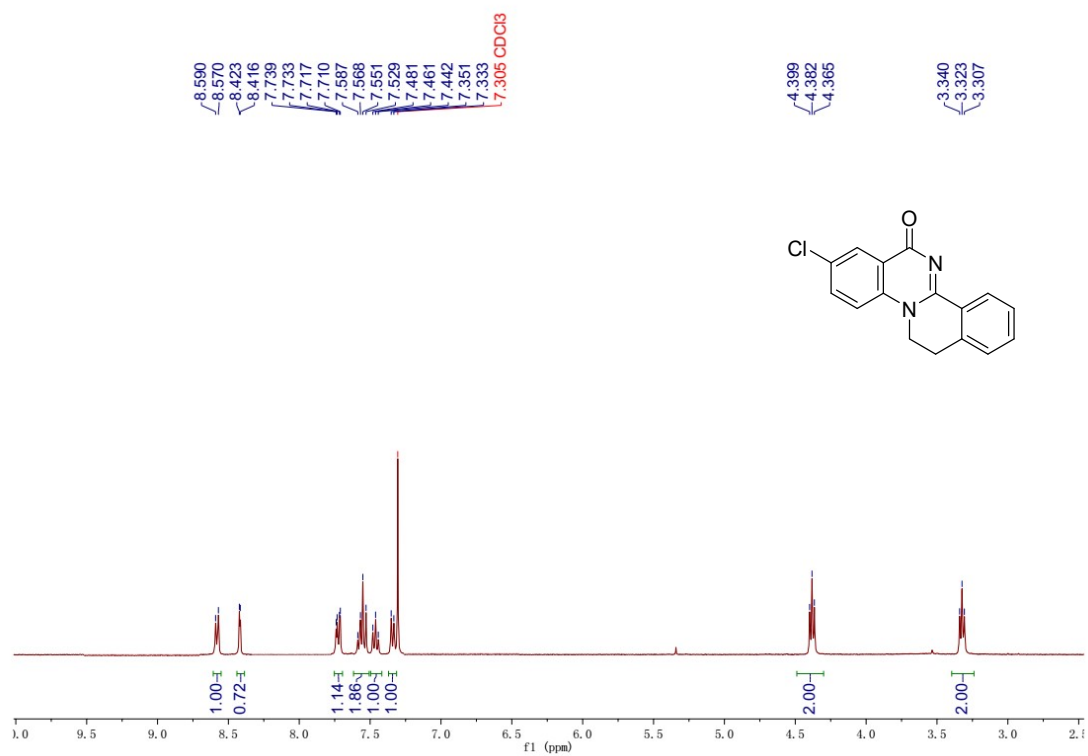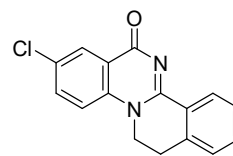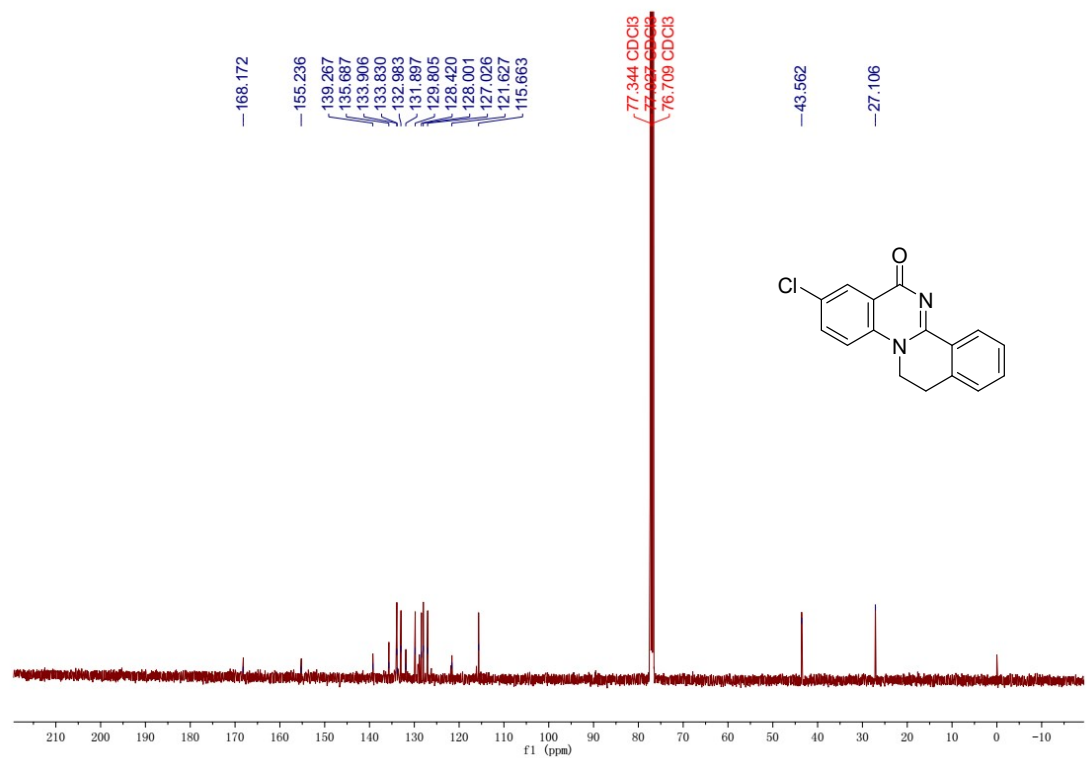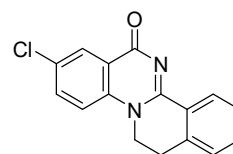

2i

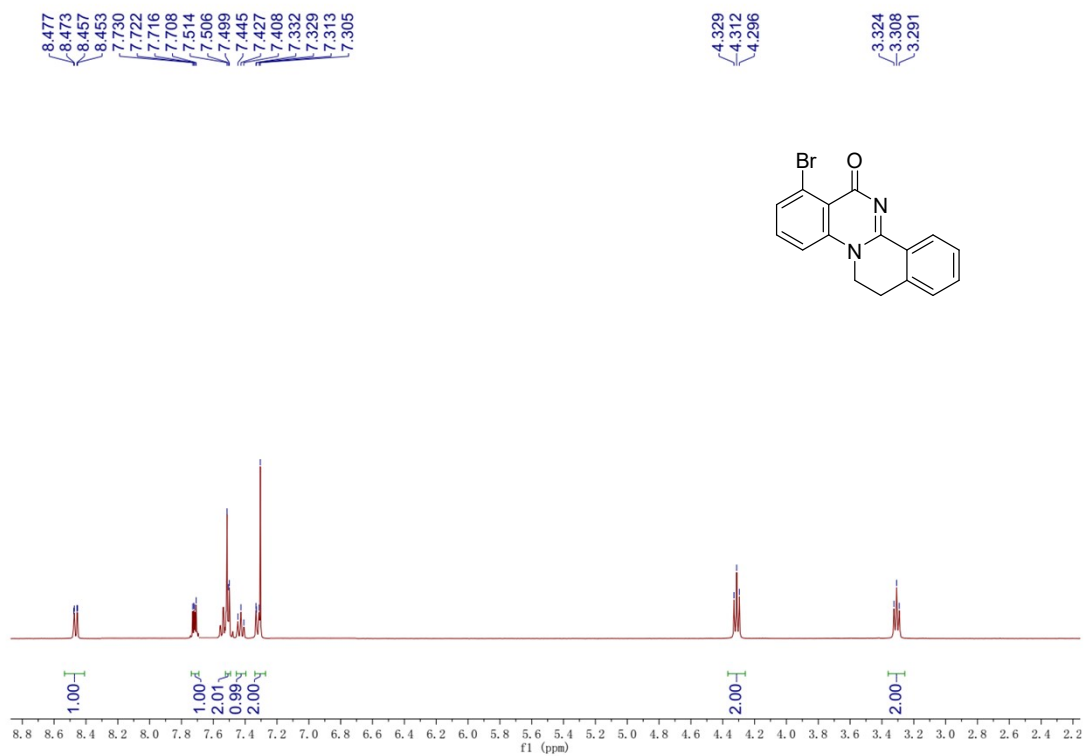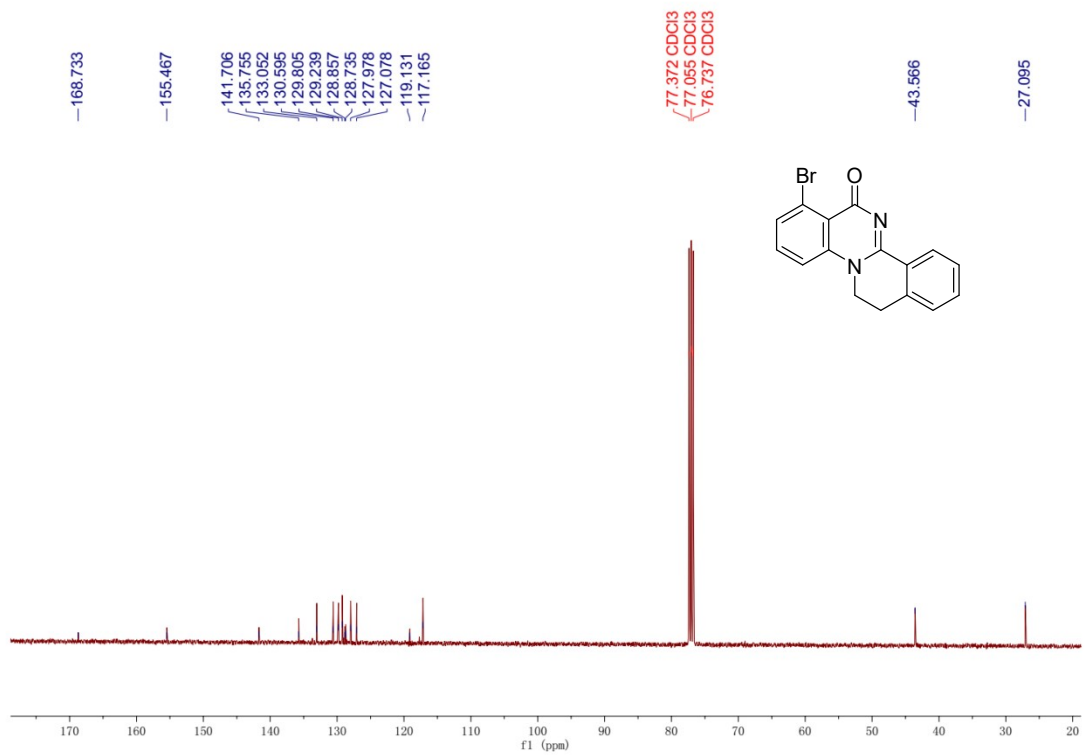

2j

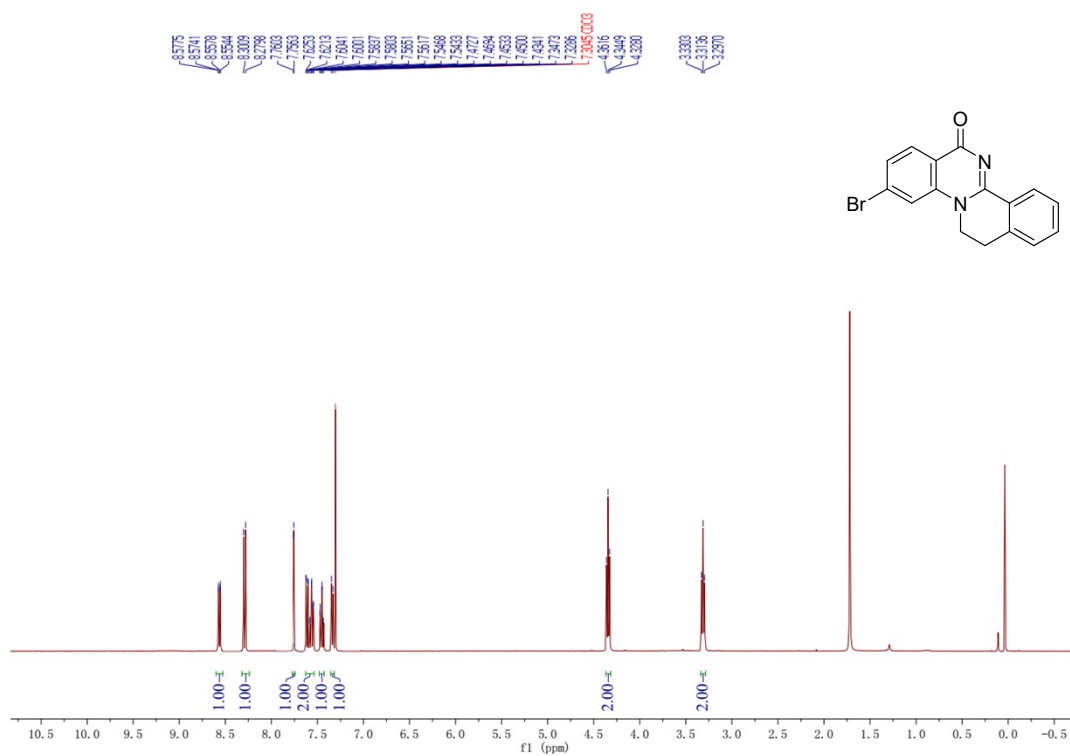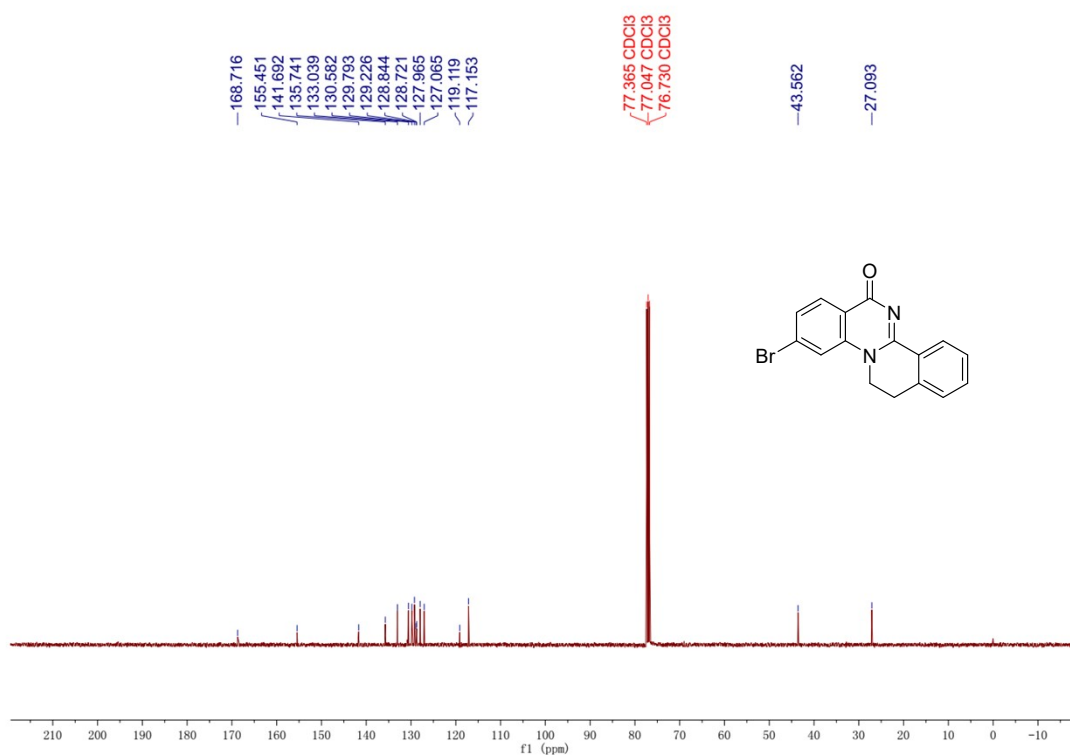

2k

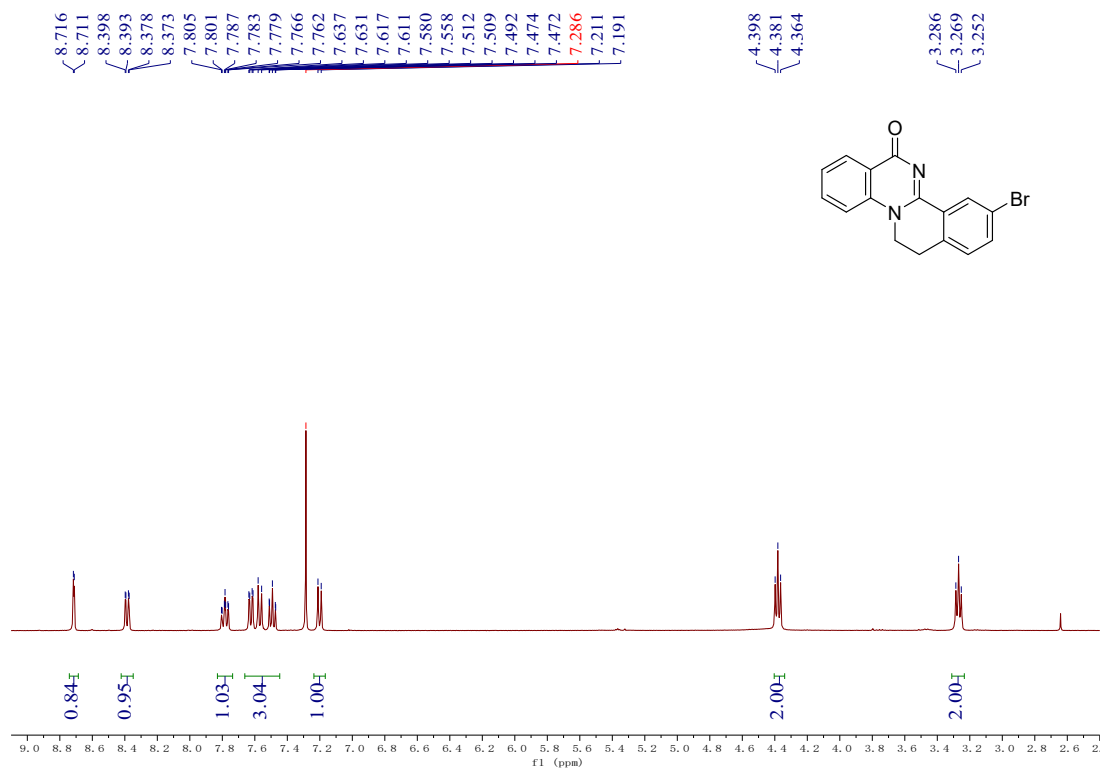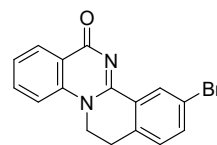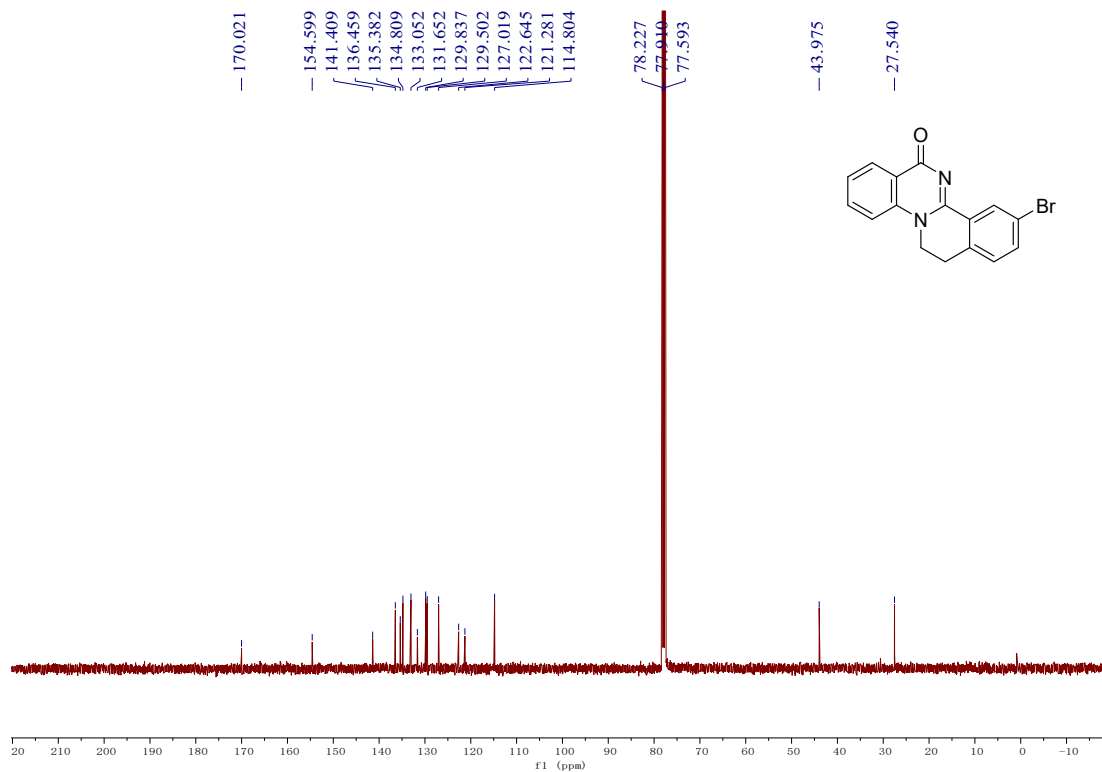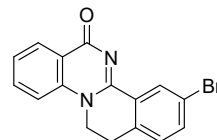

4a

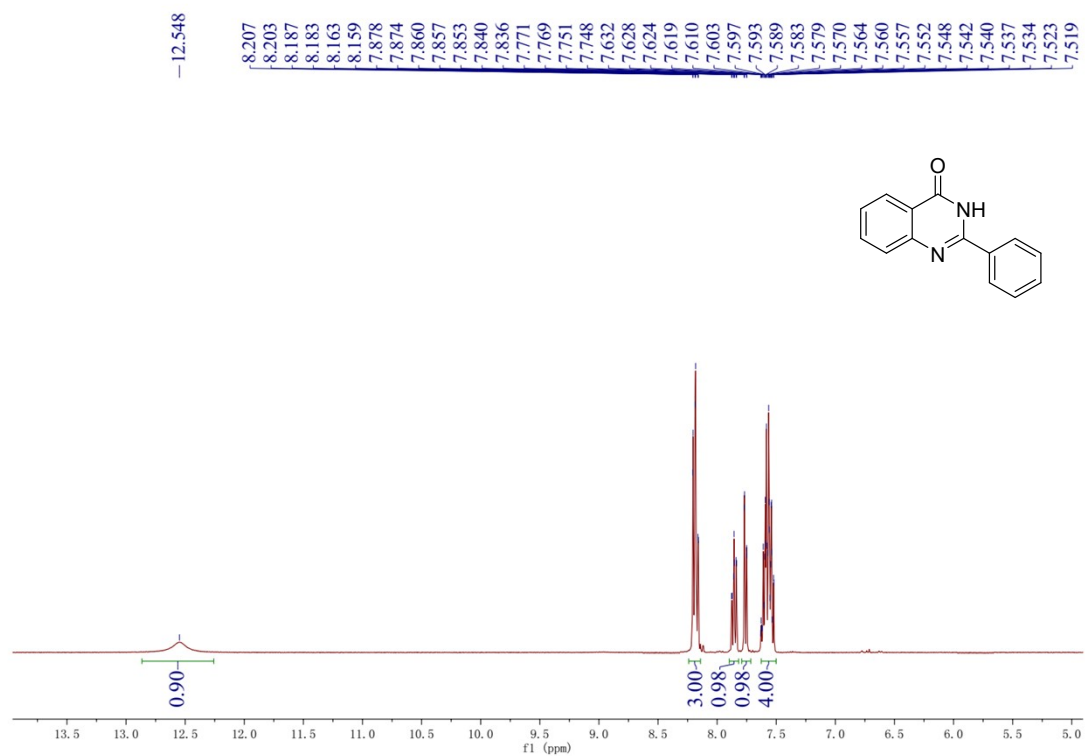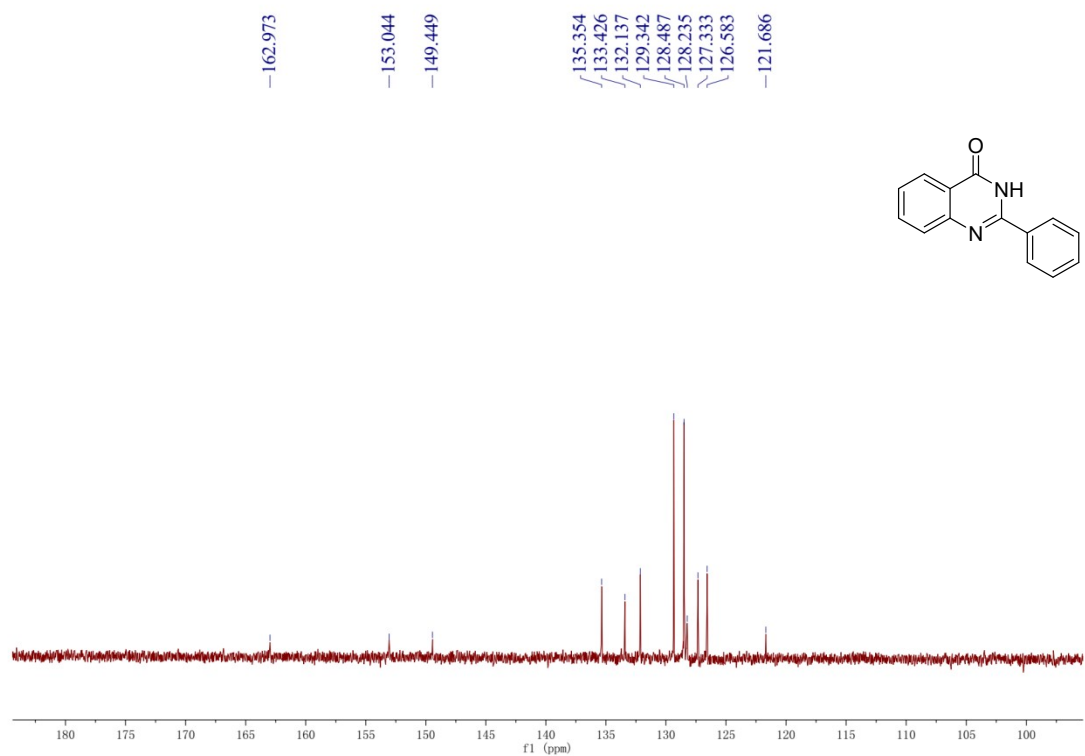

4b

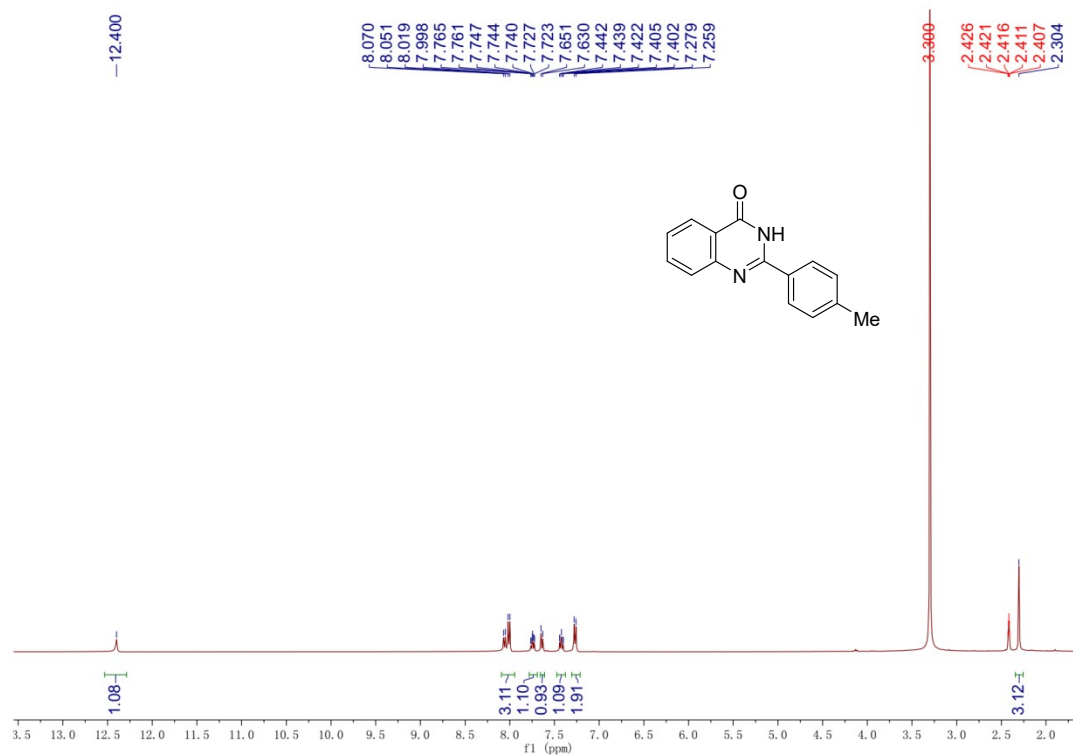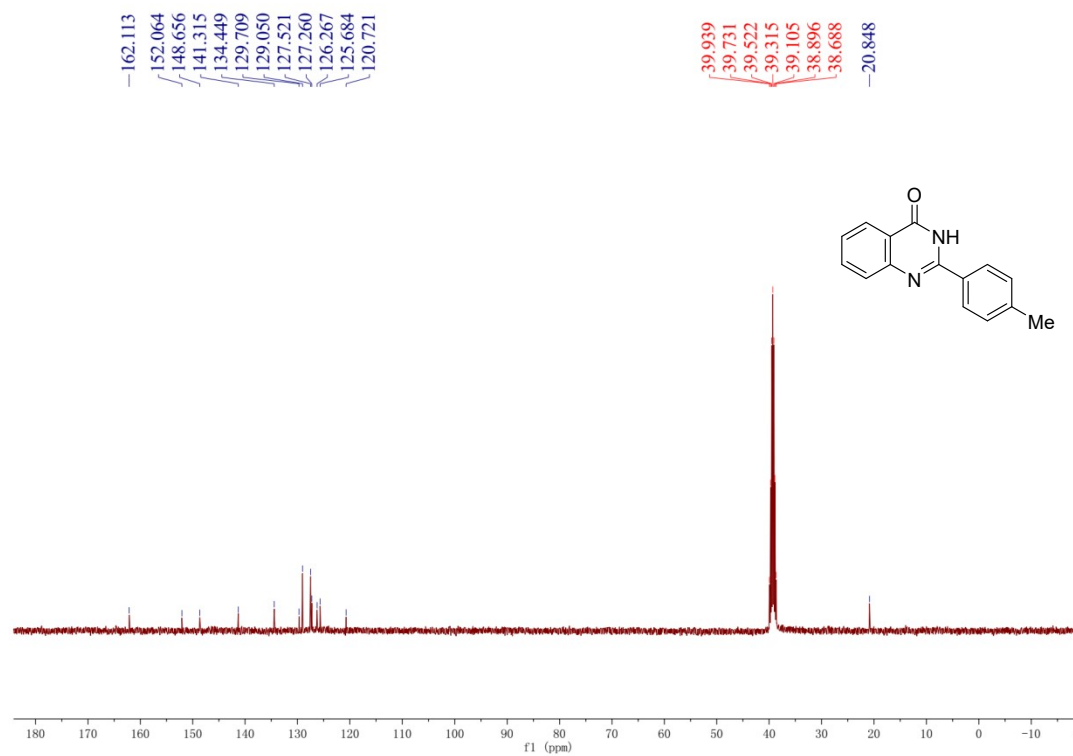

4c

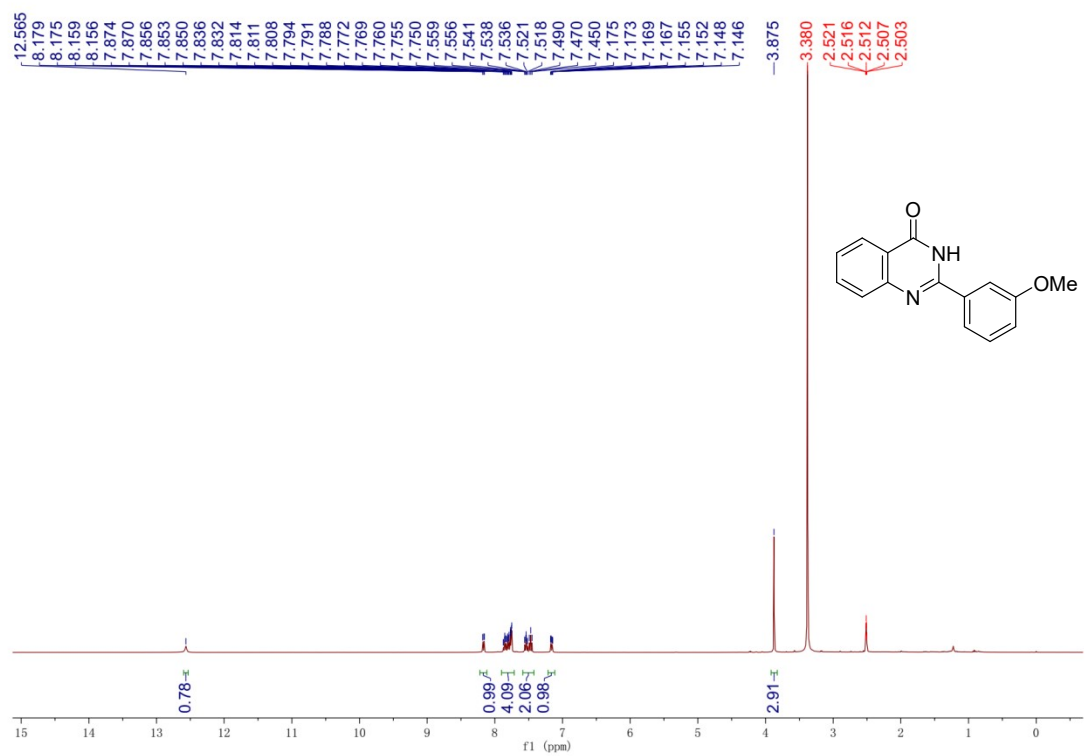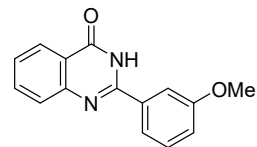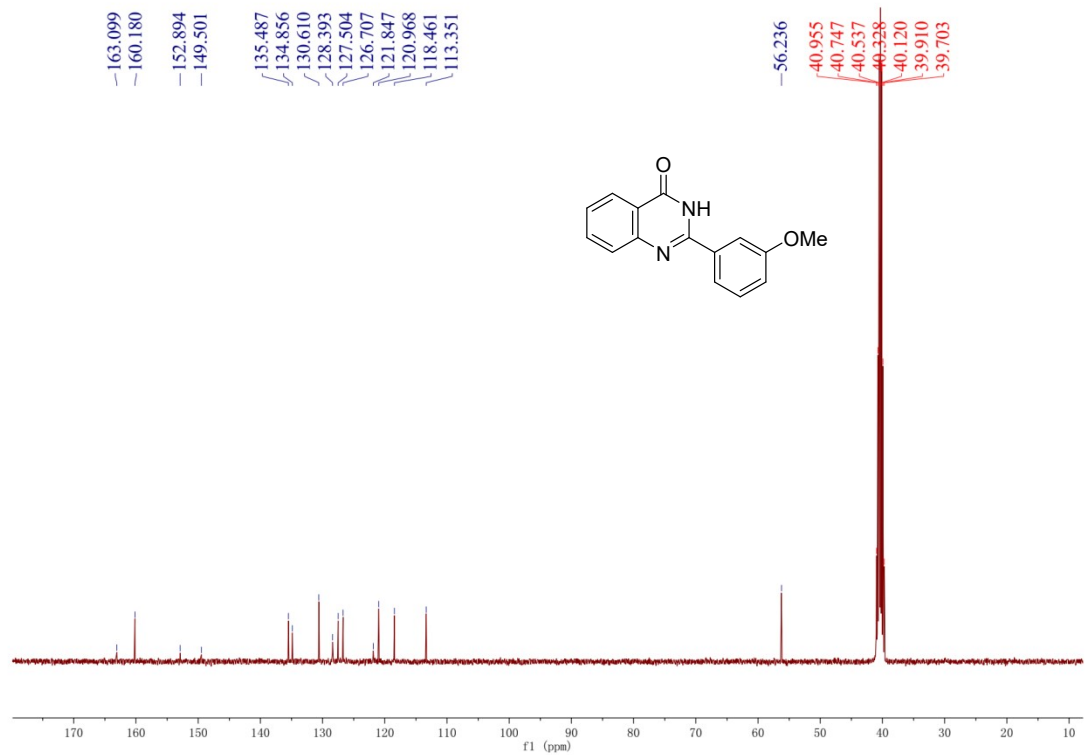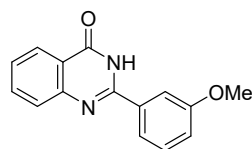



4d

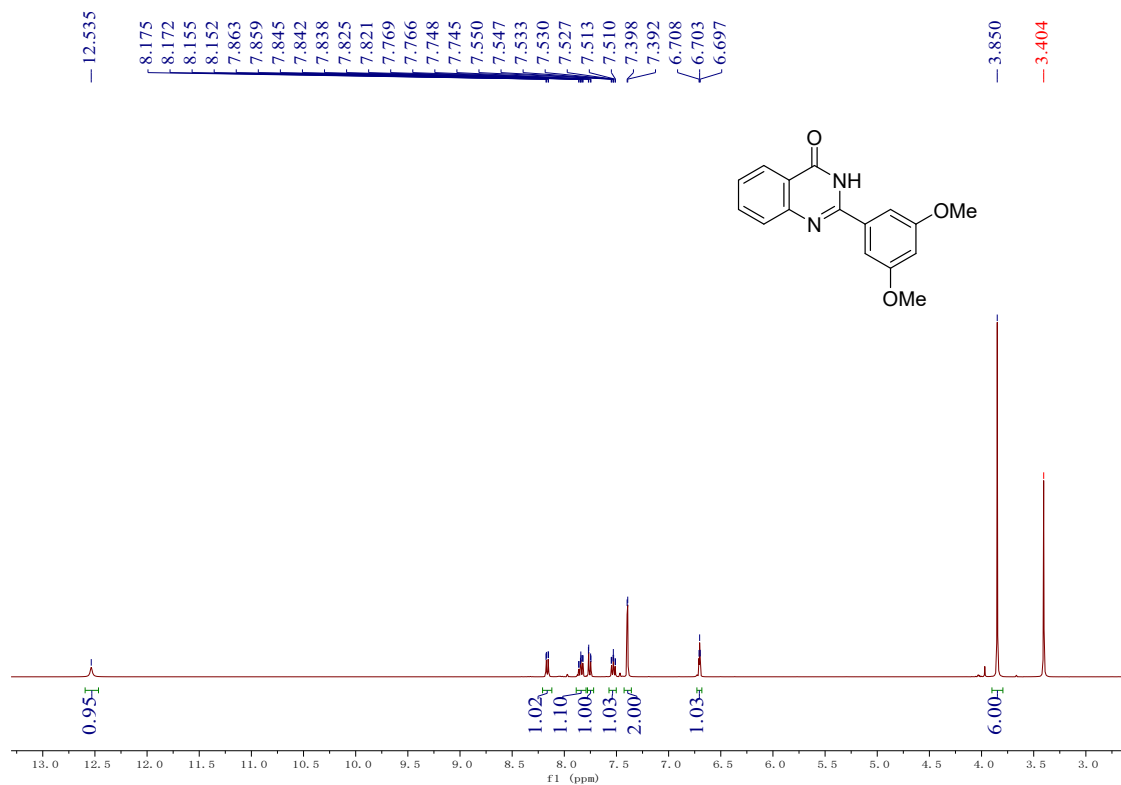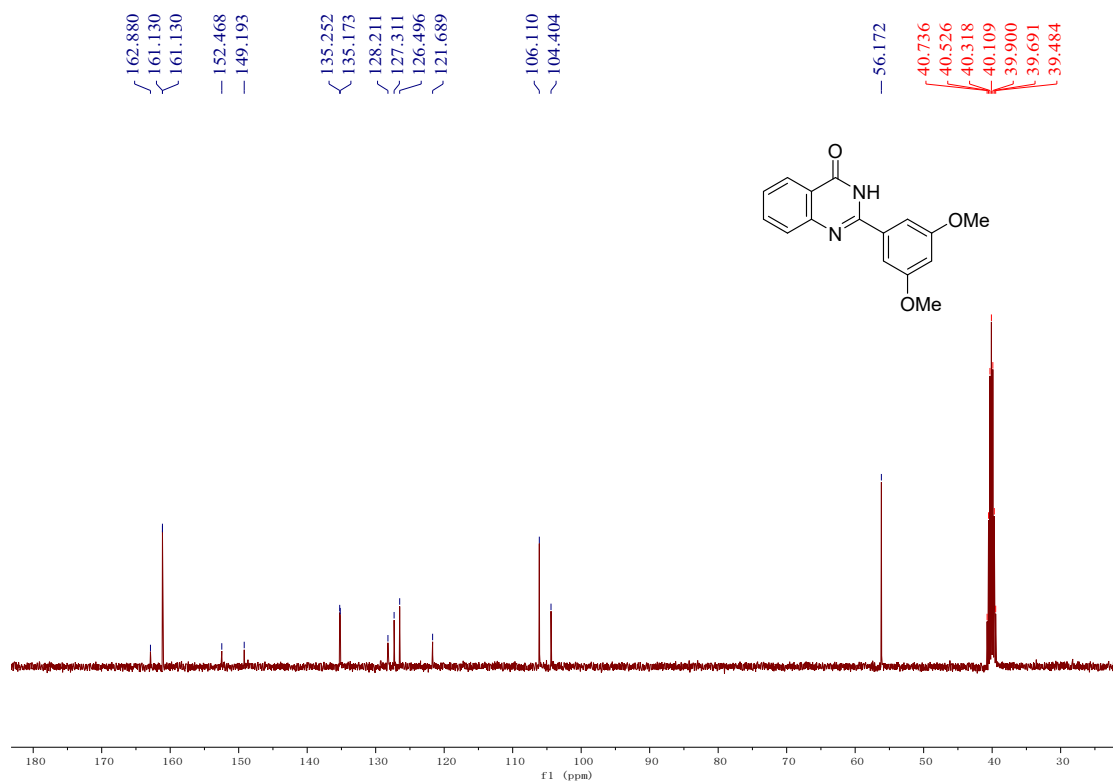

4e

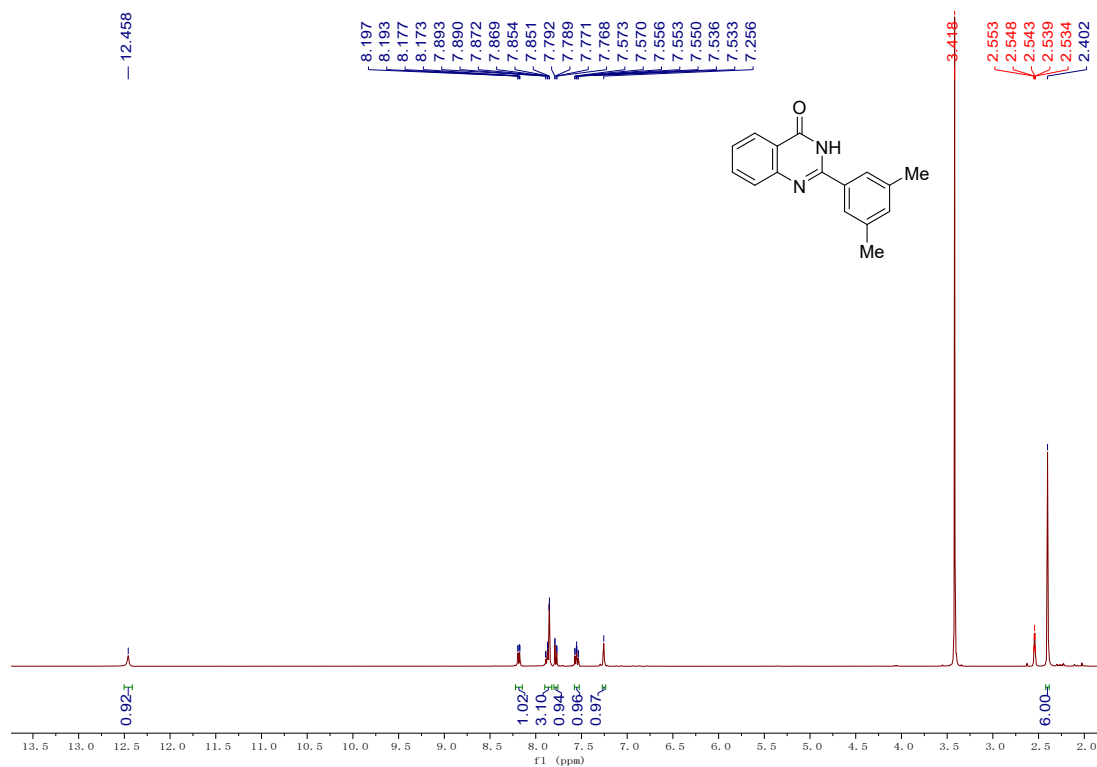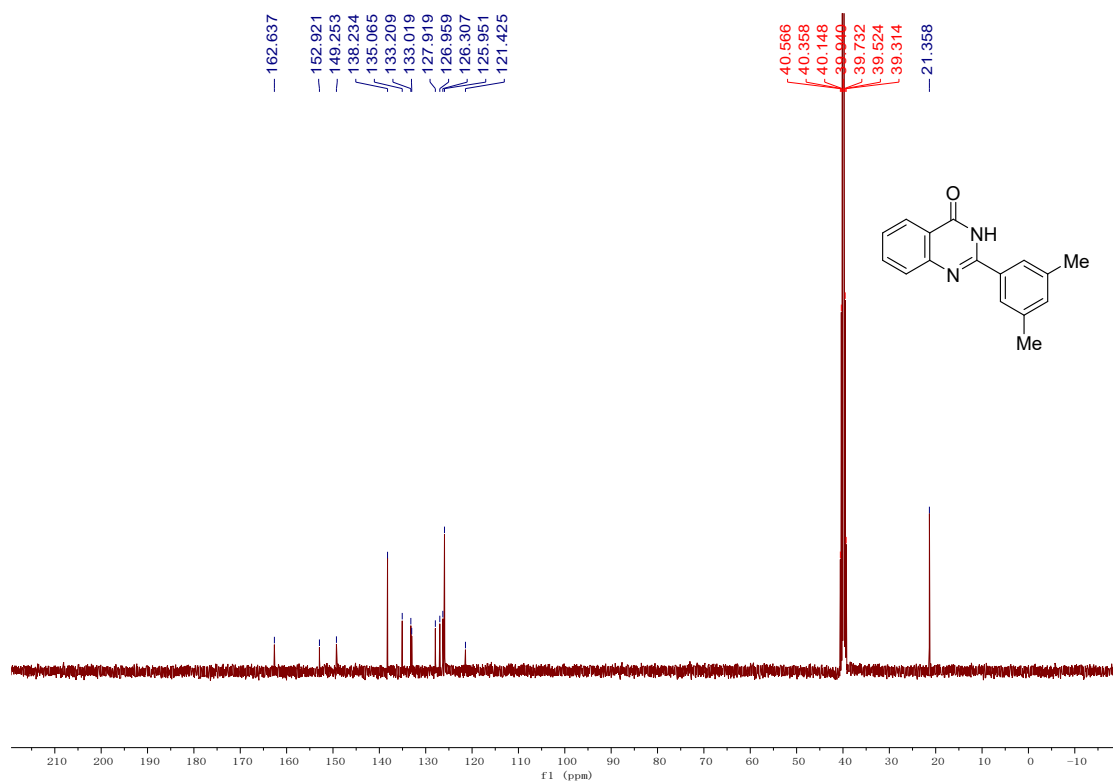

4f

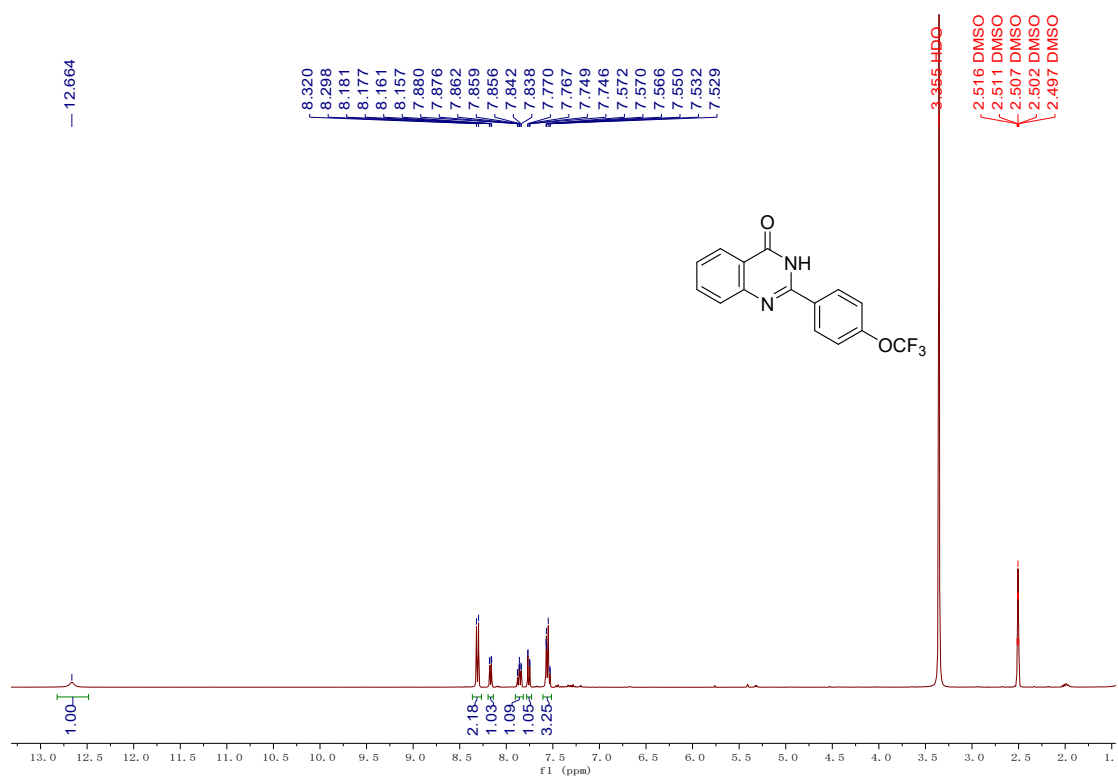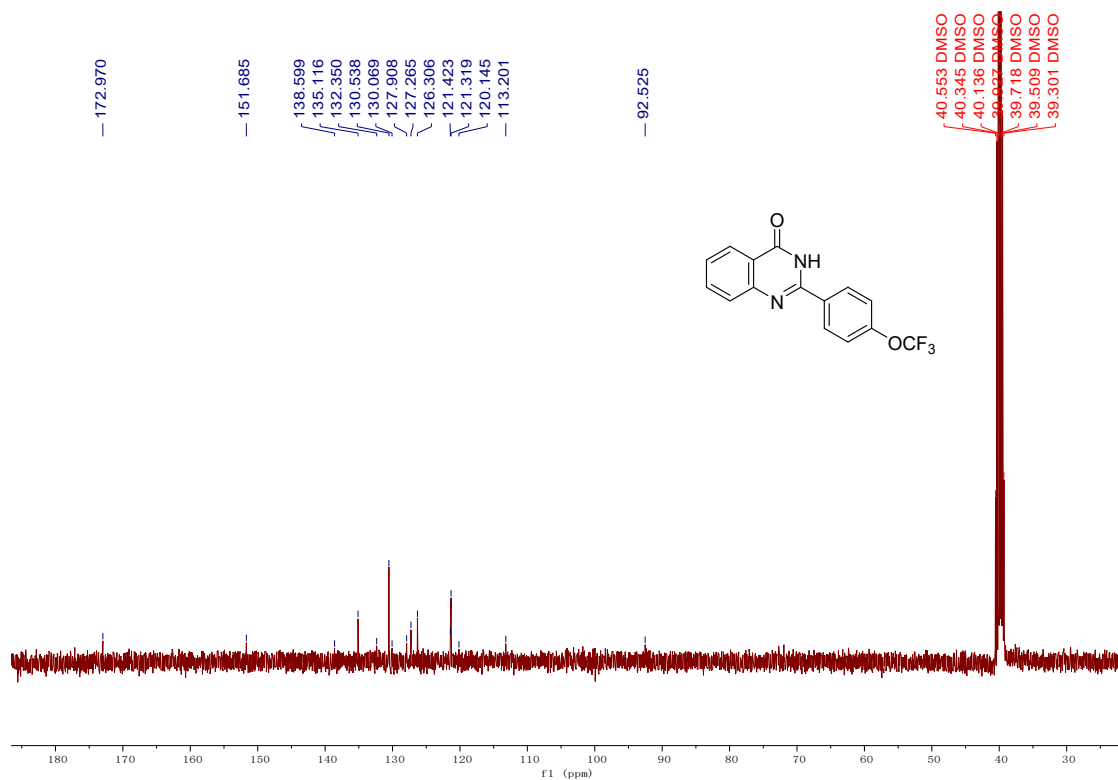

4g

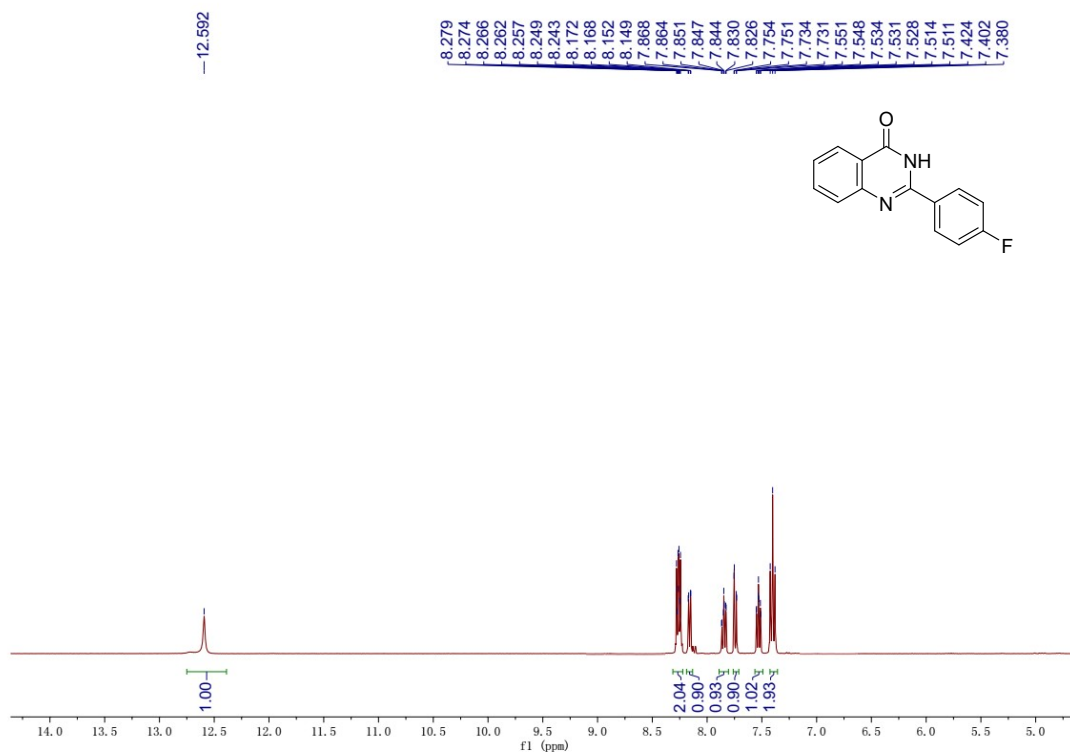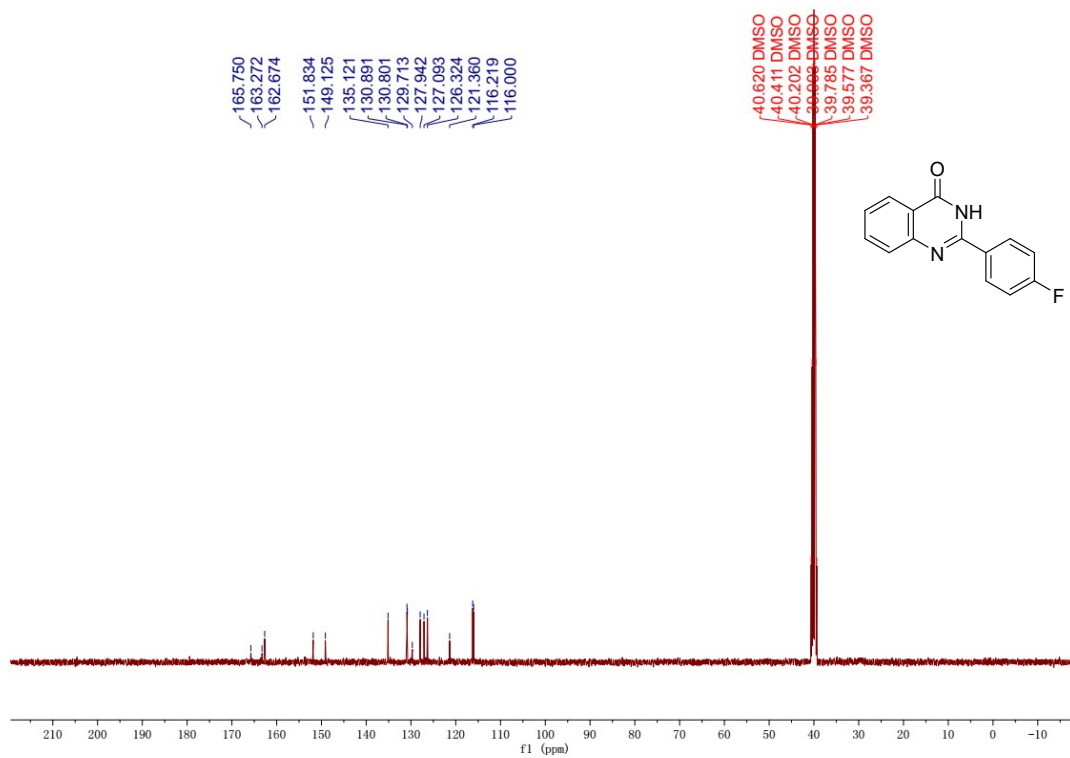

4h

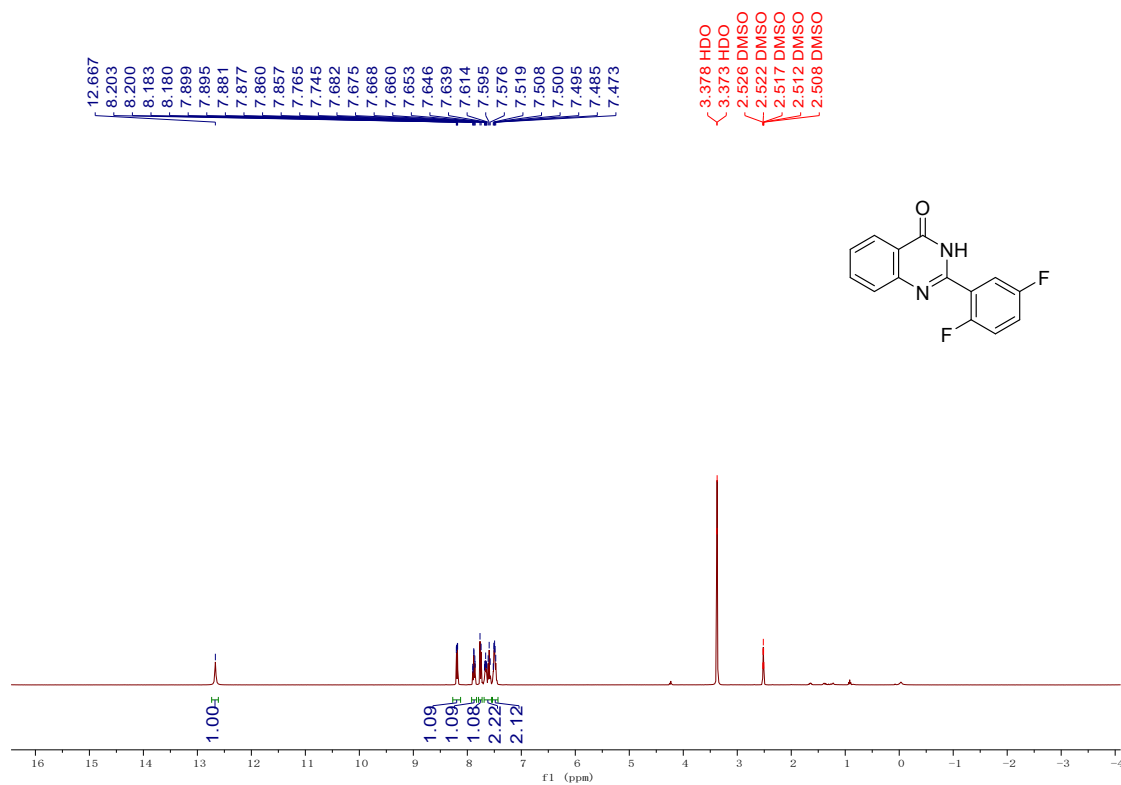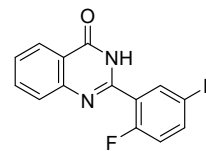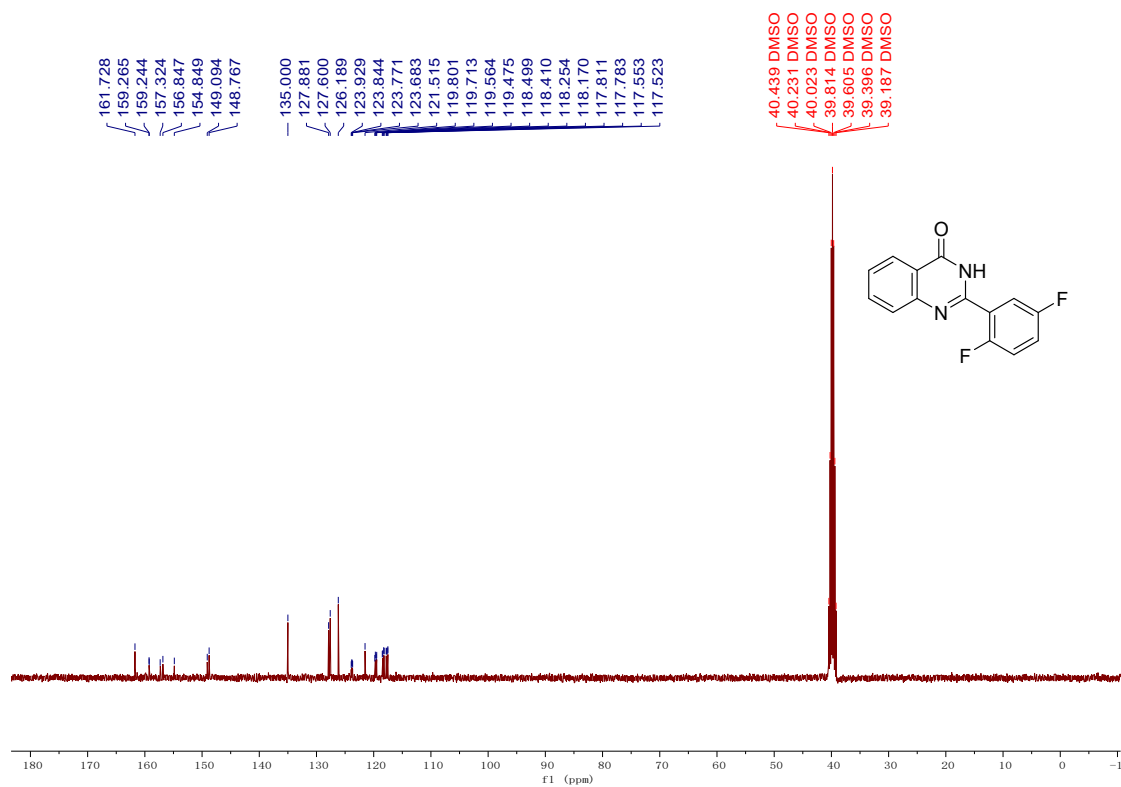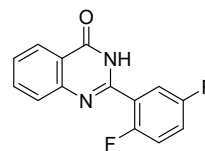

4i

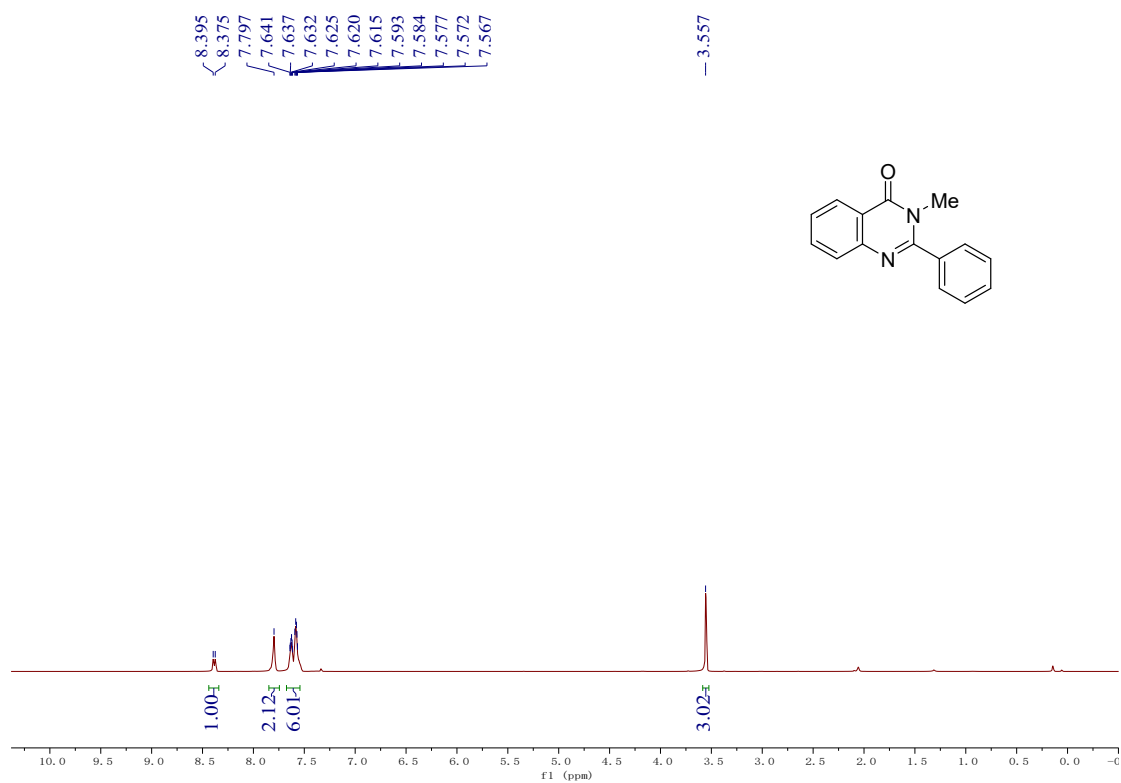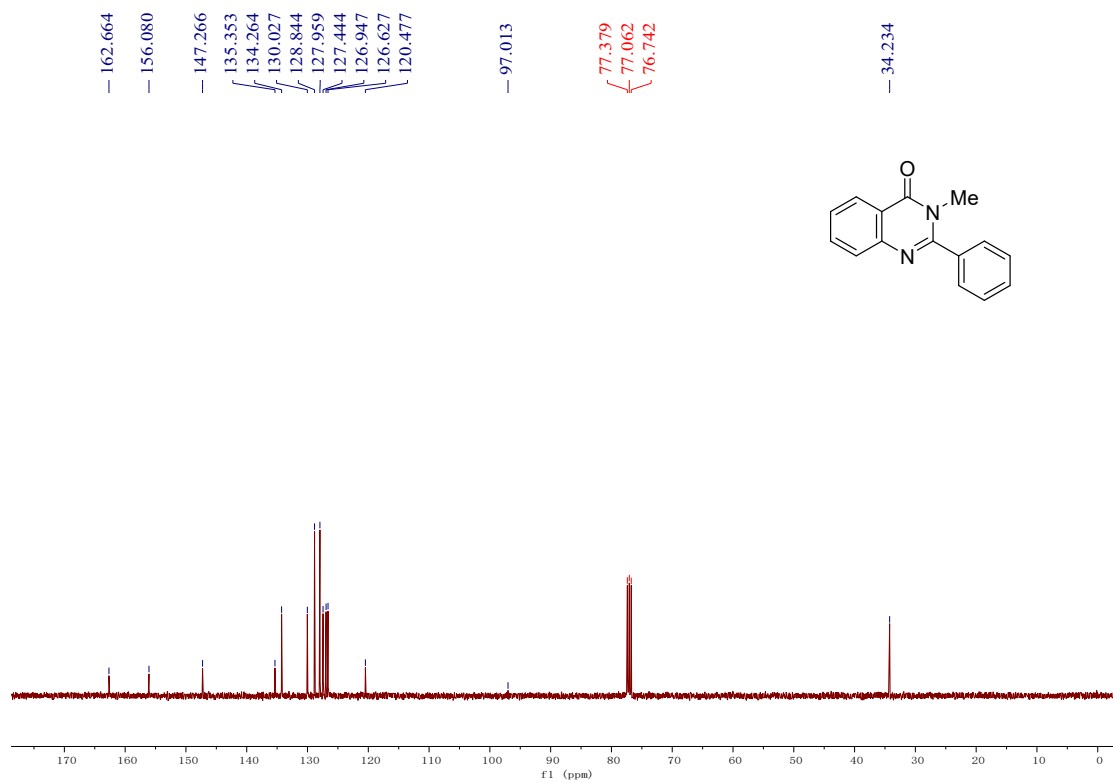

4j

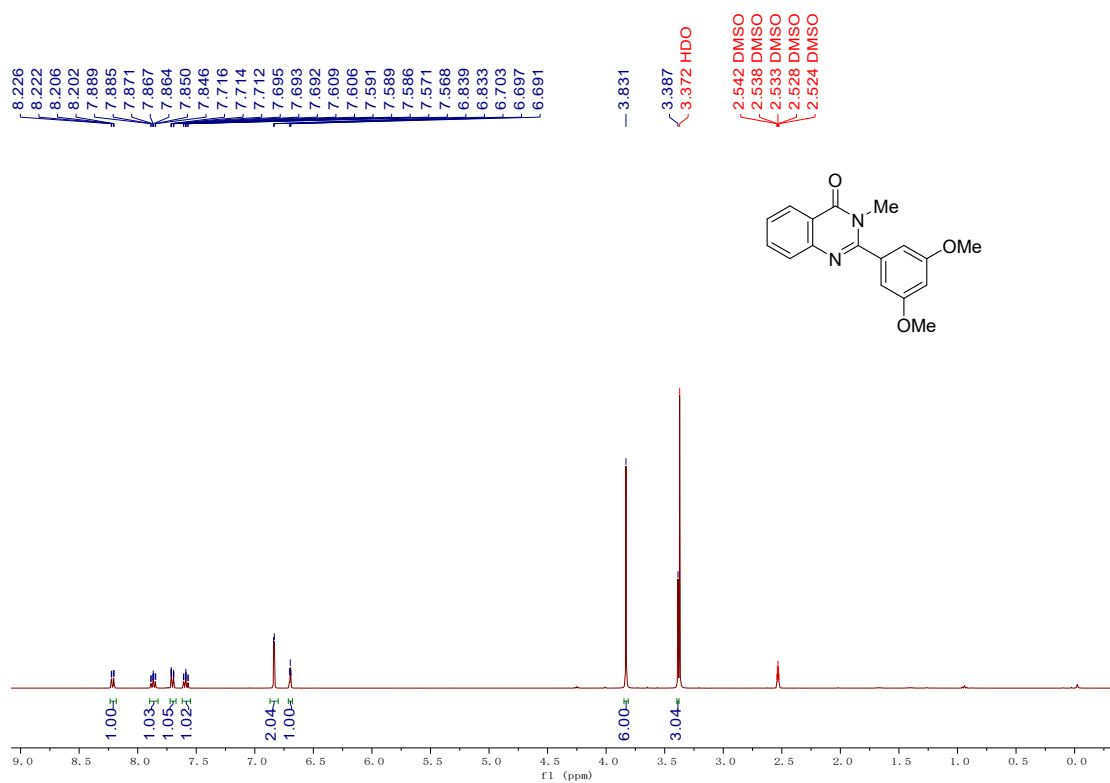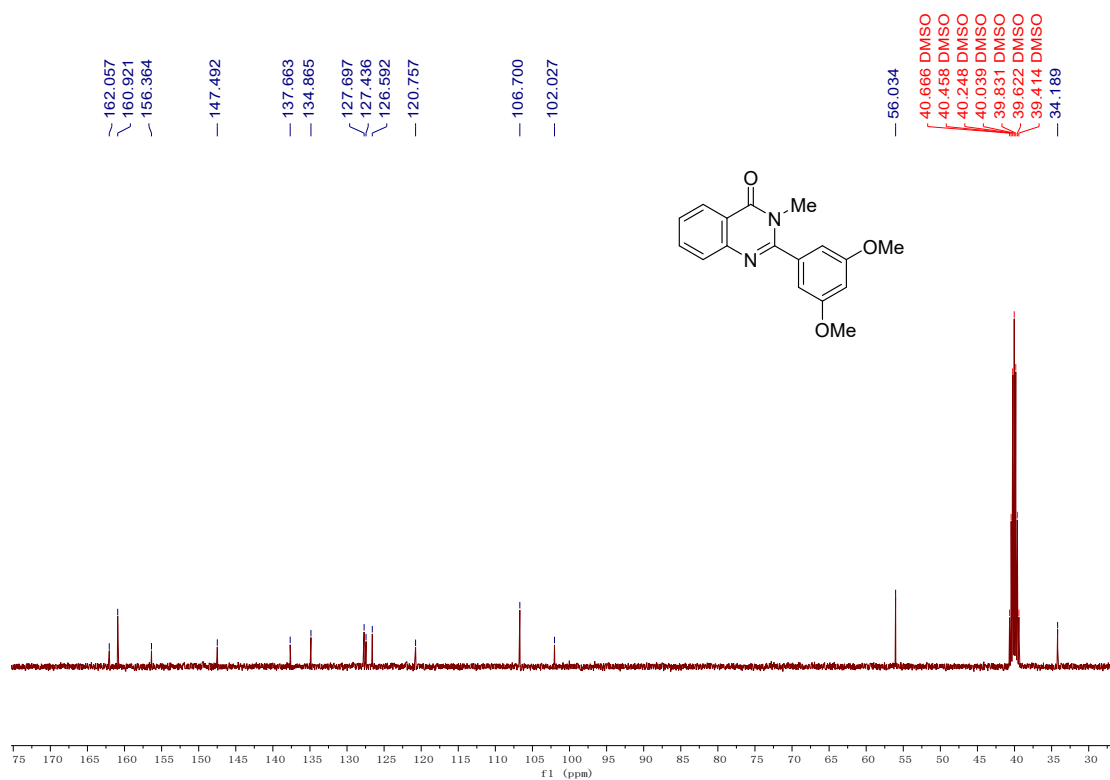

4k

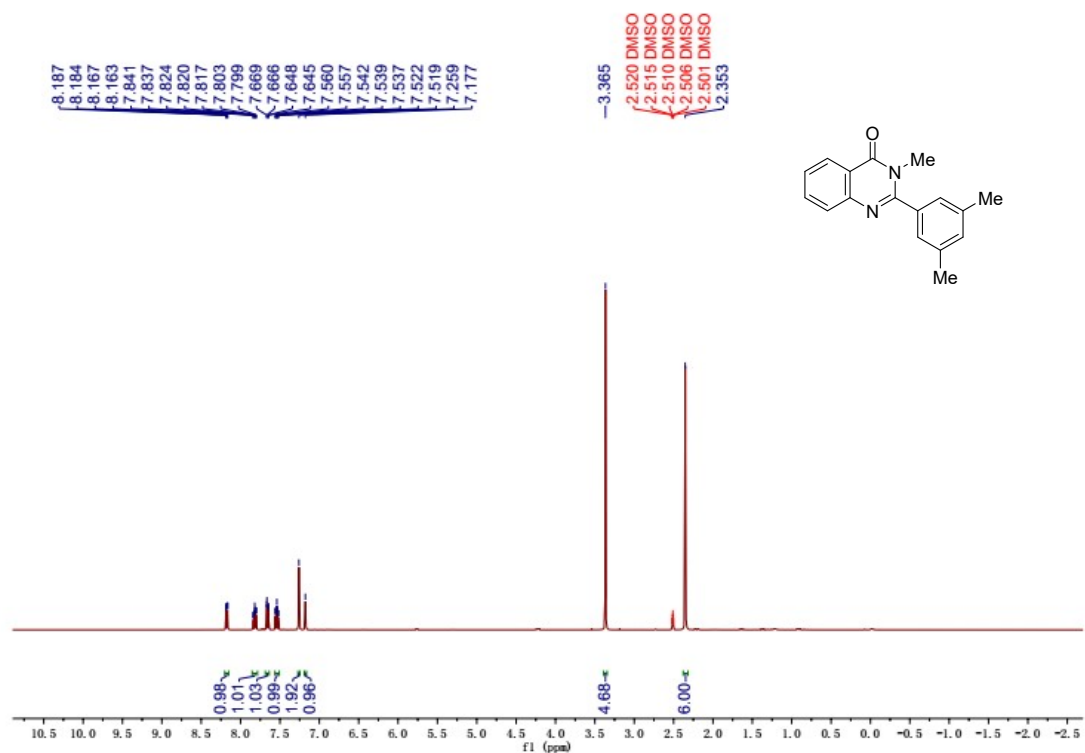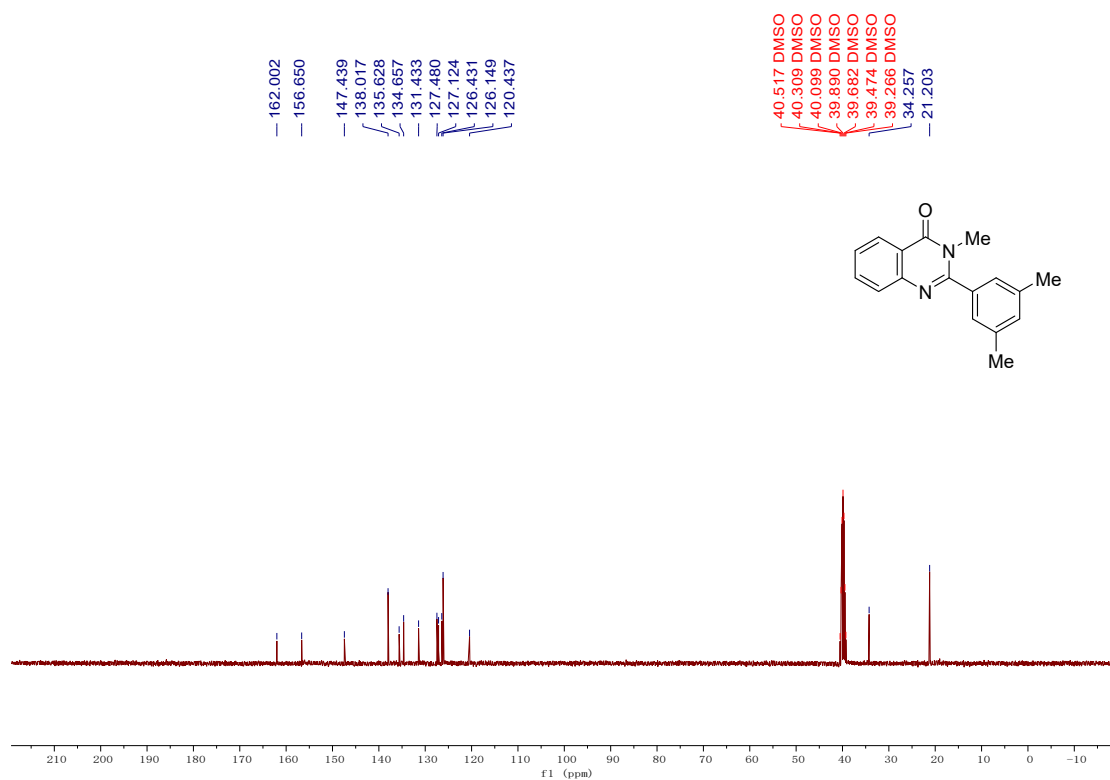



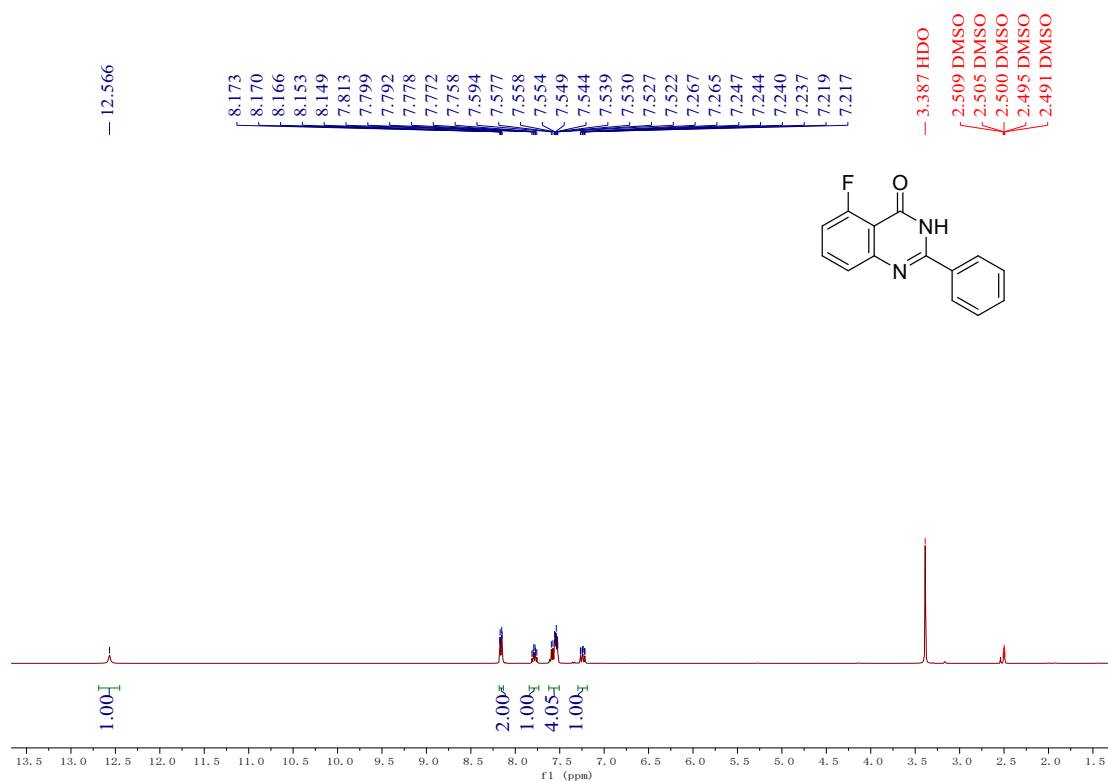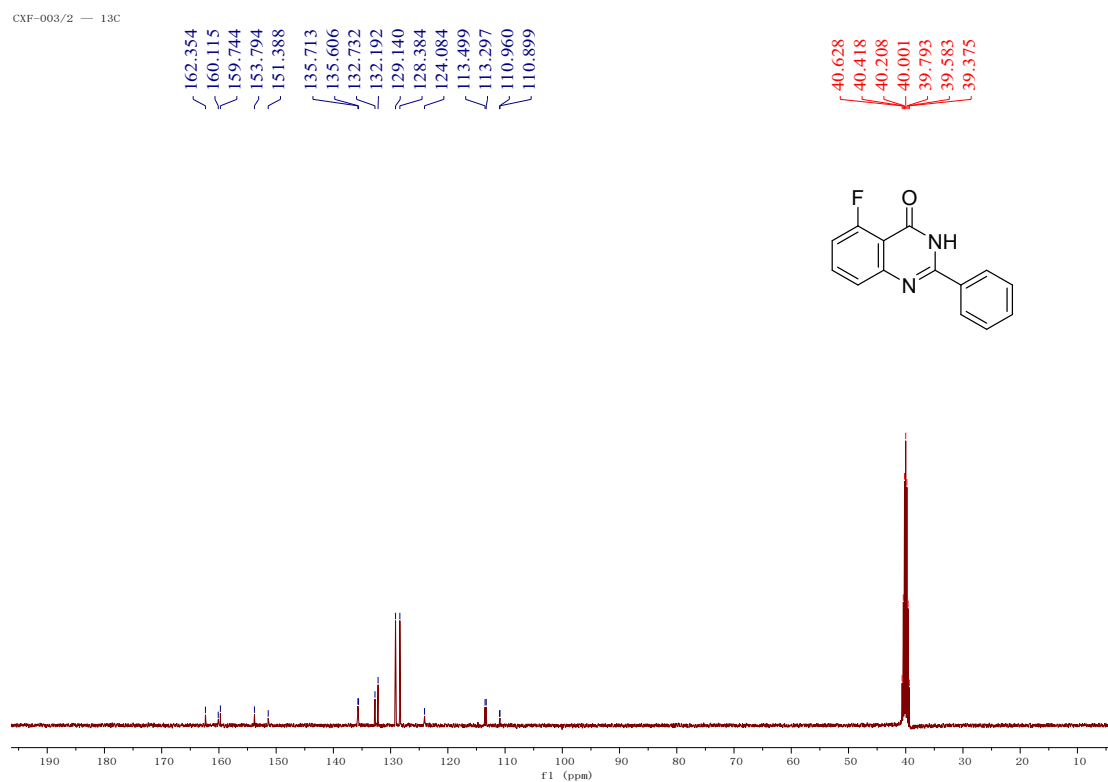

4m

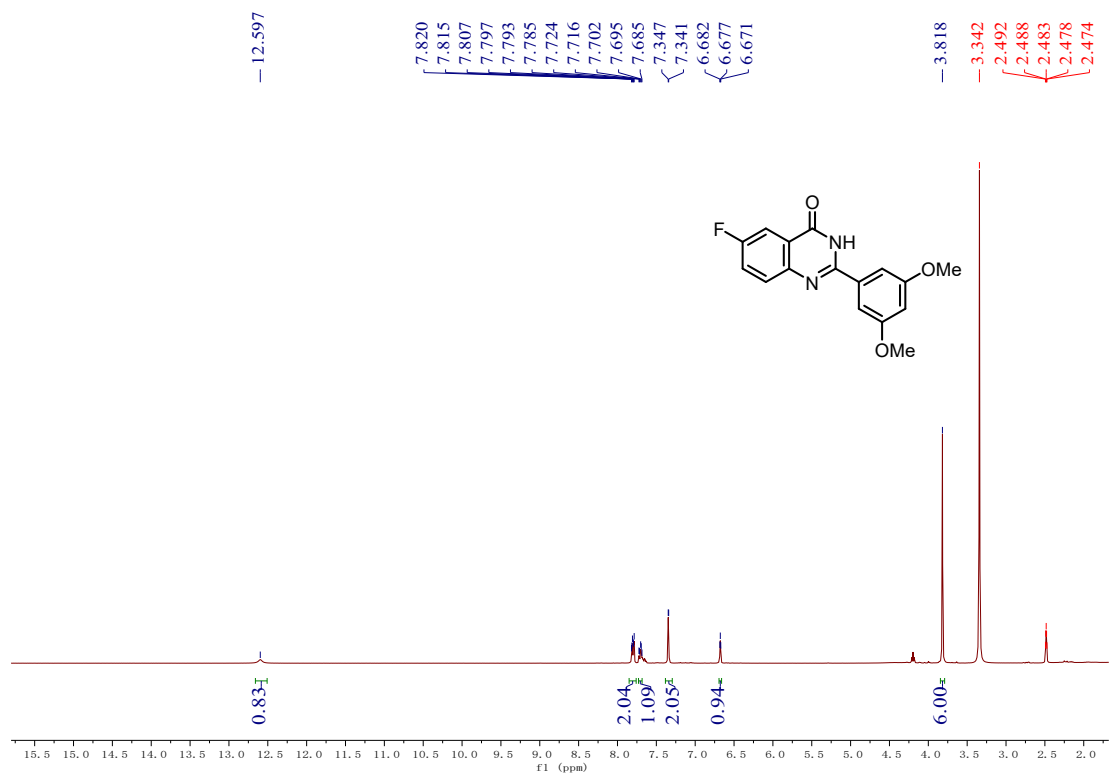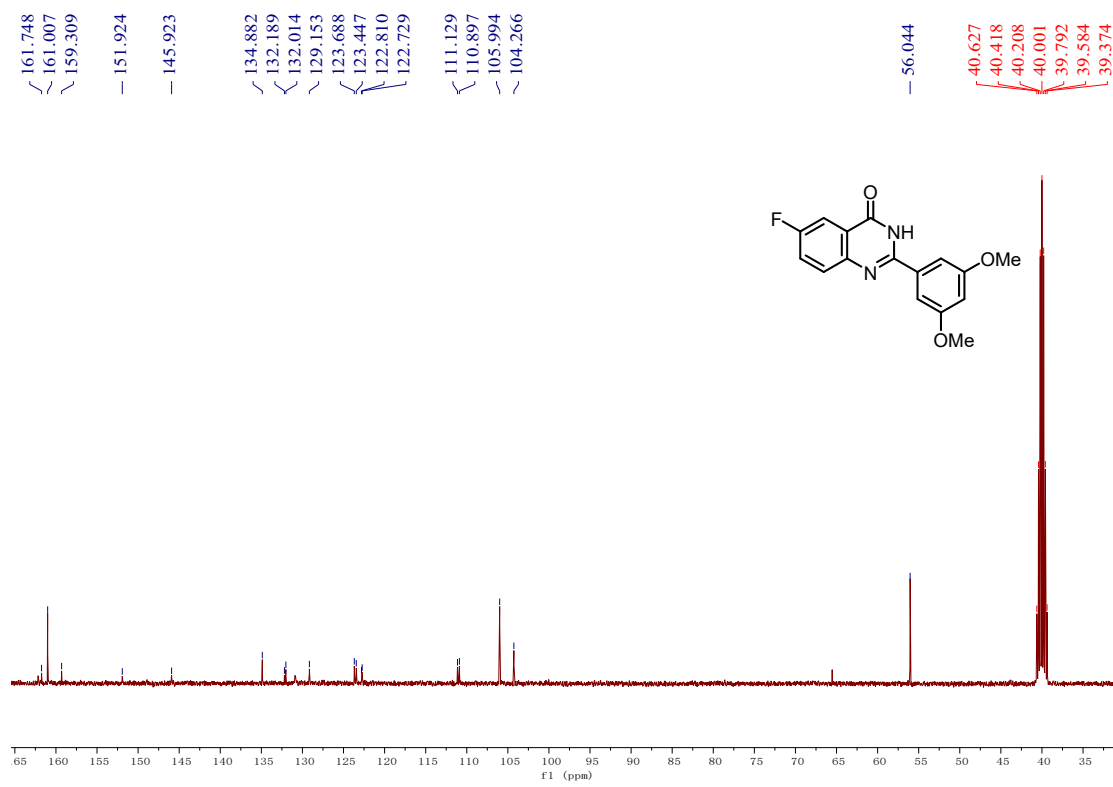

6a

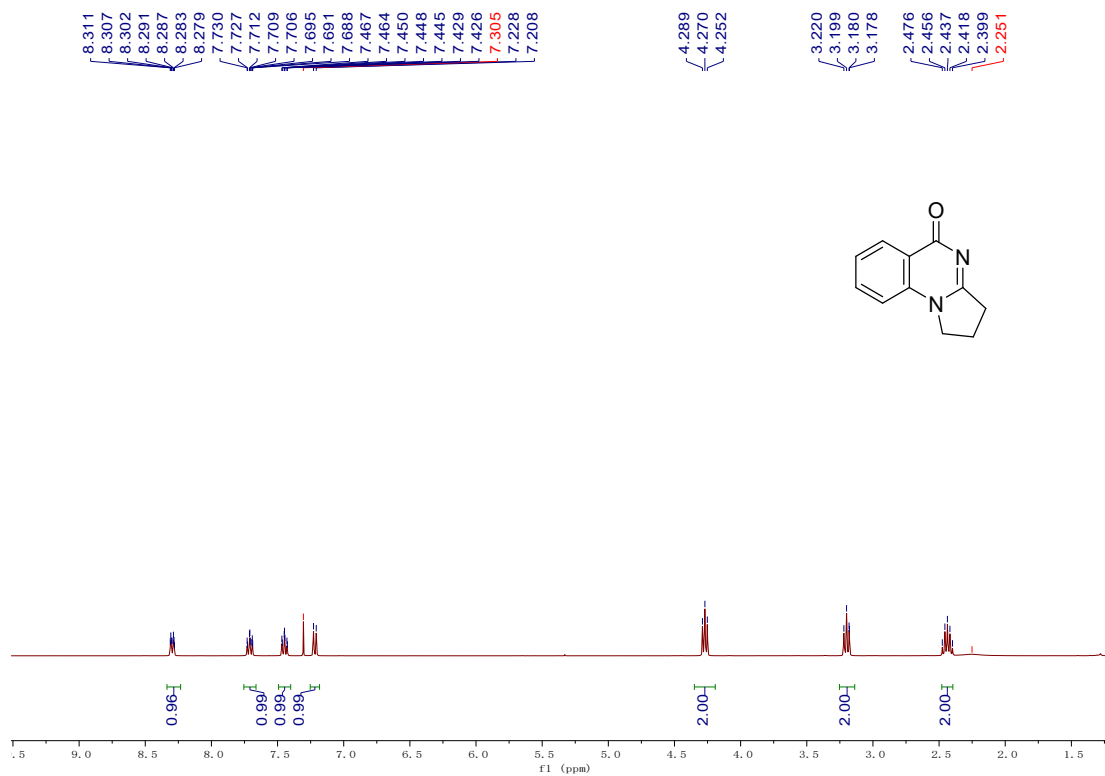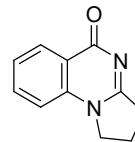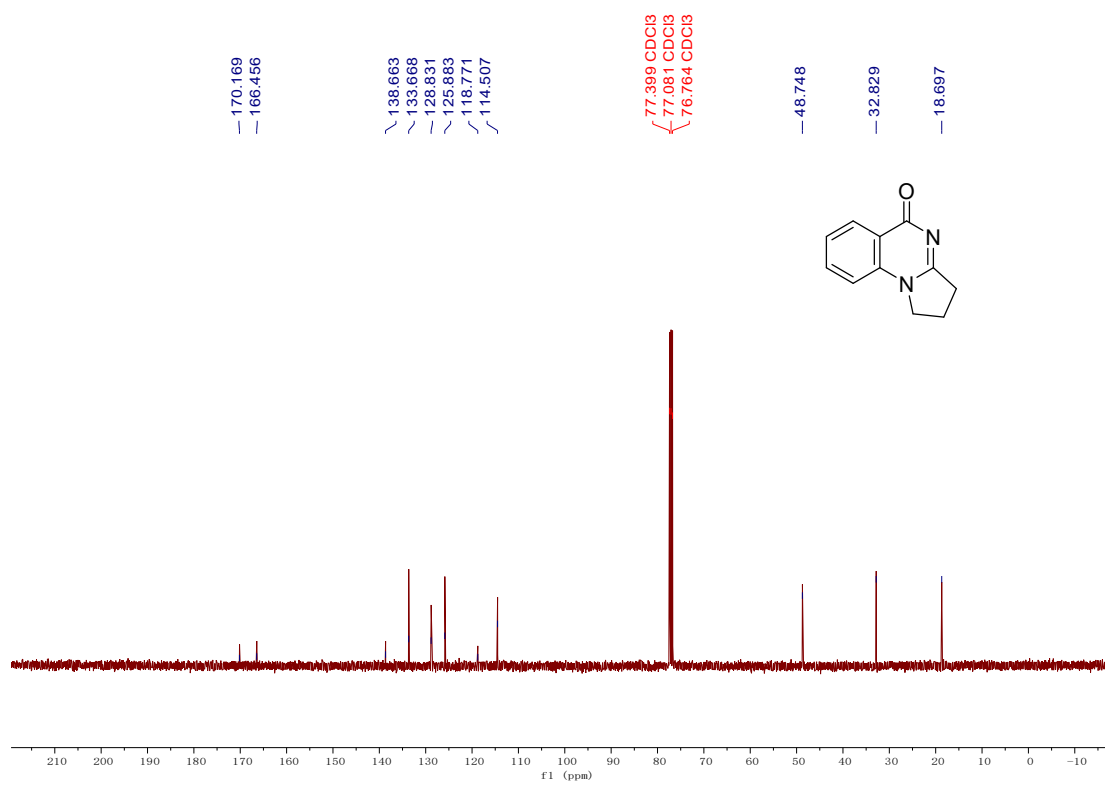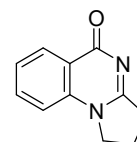

6b

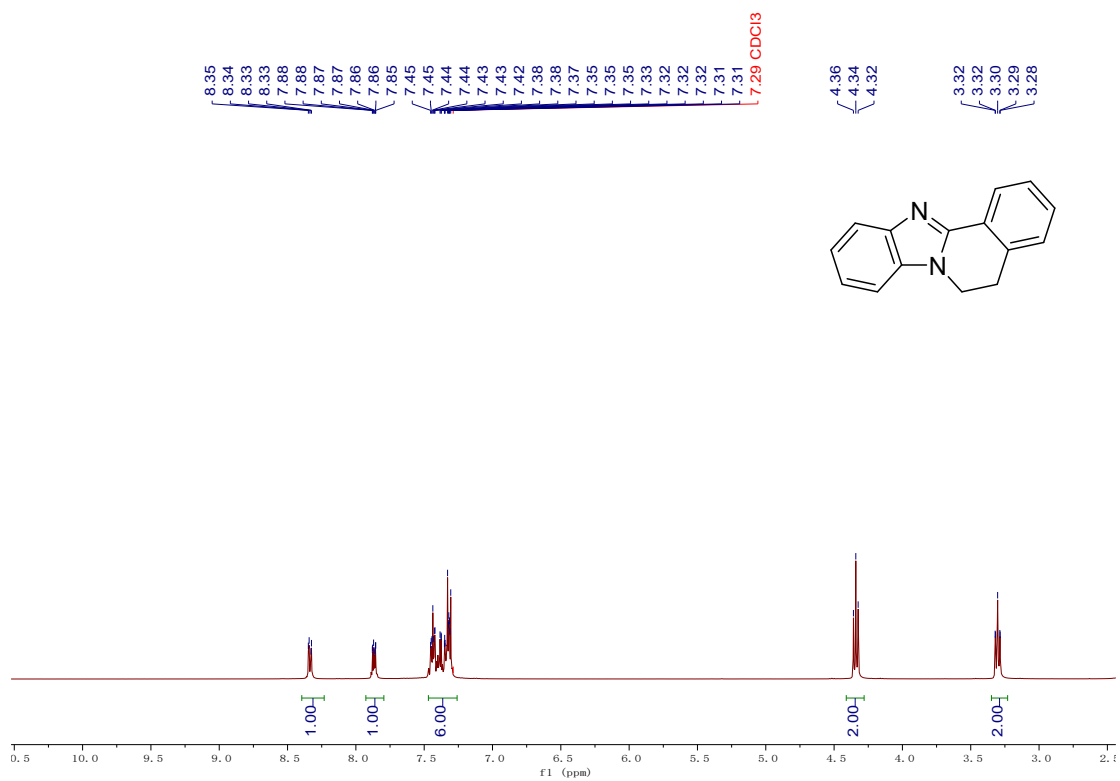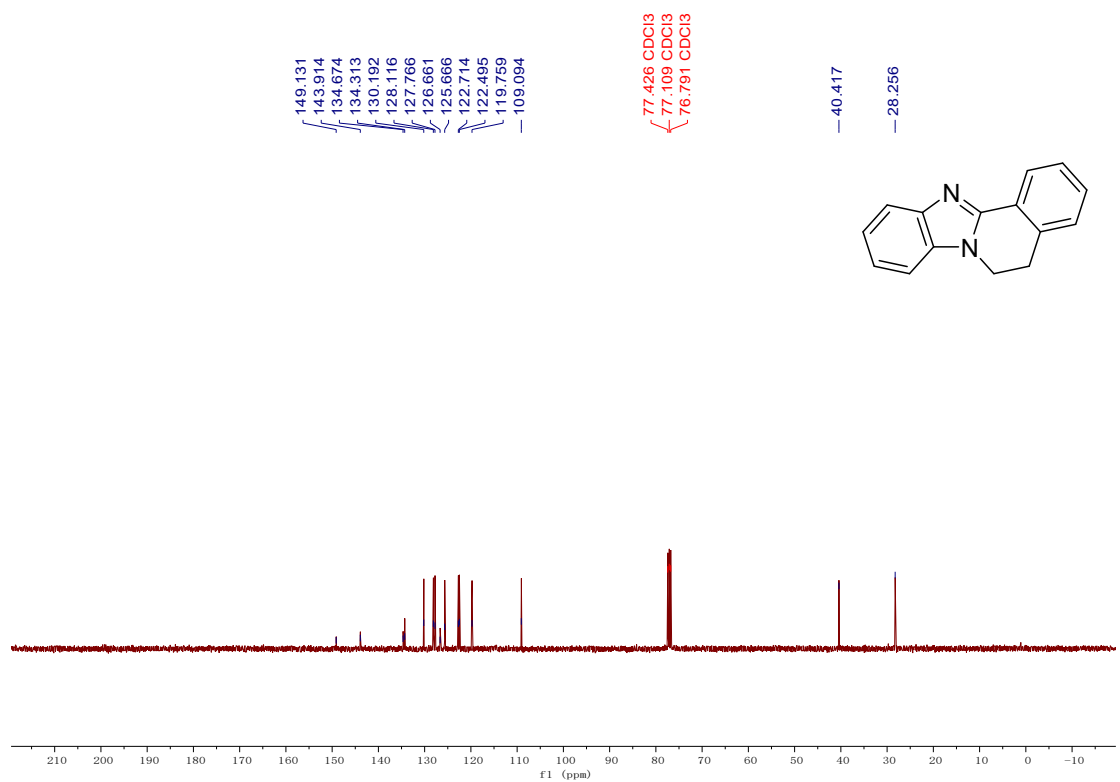

6c

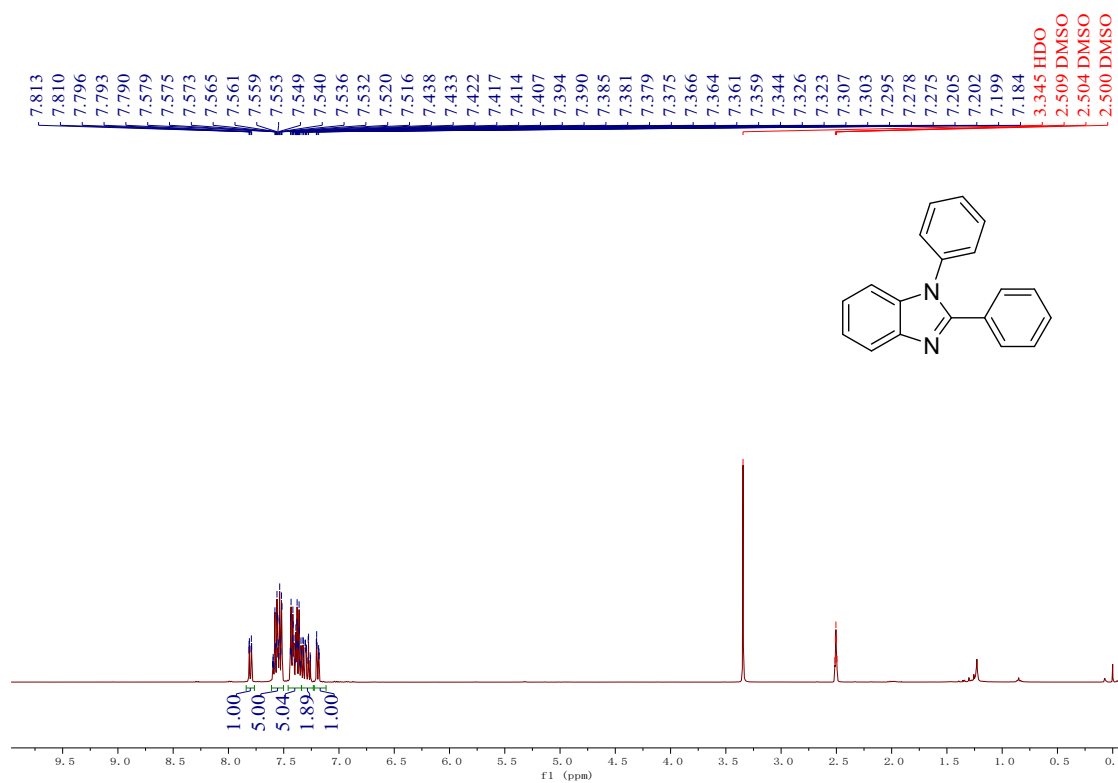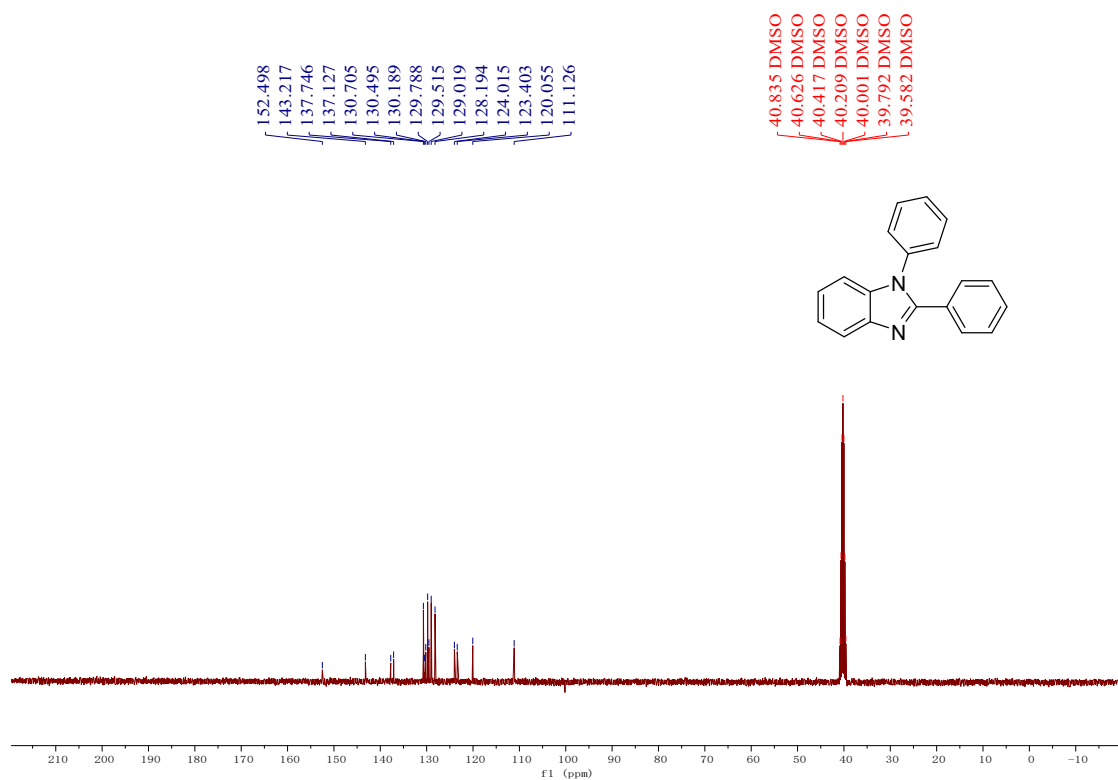

6d

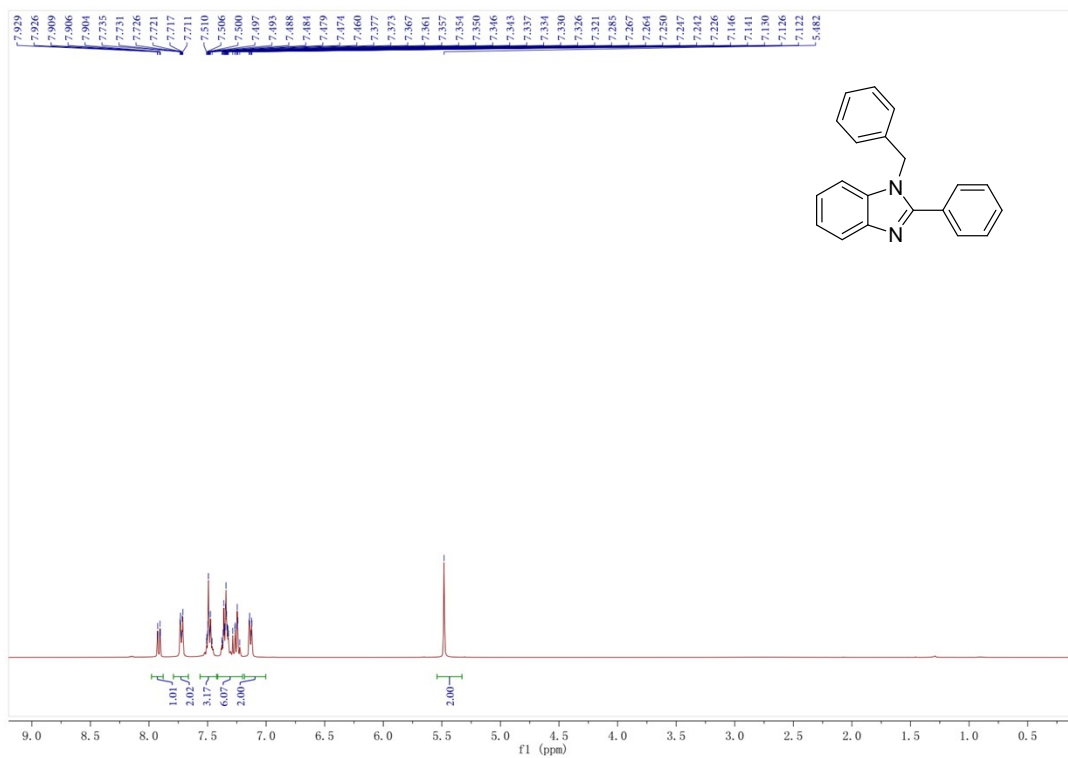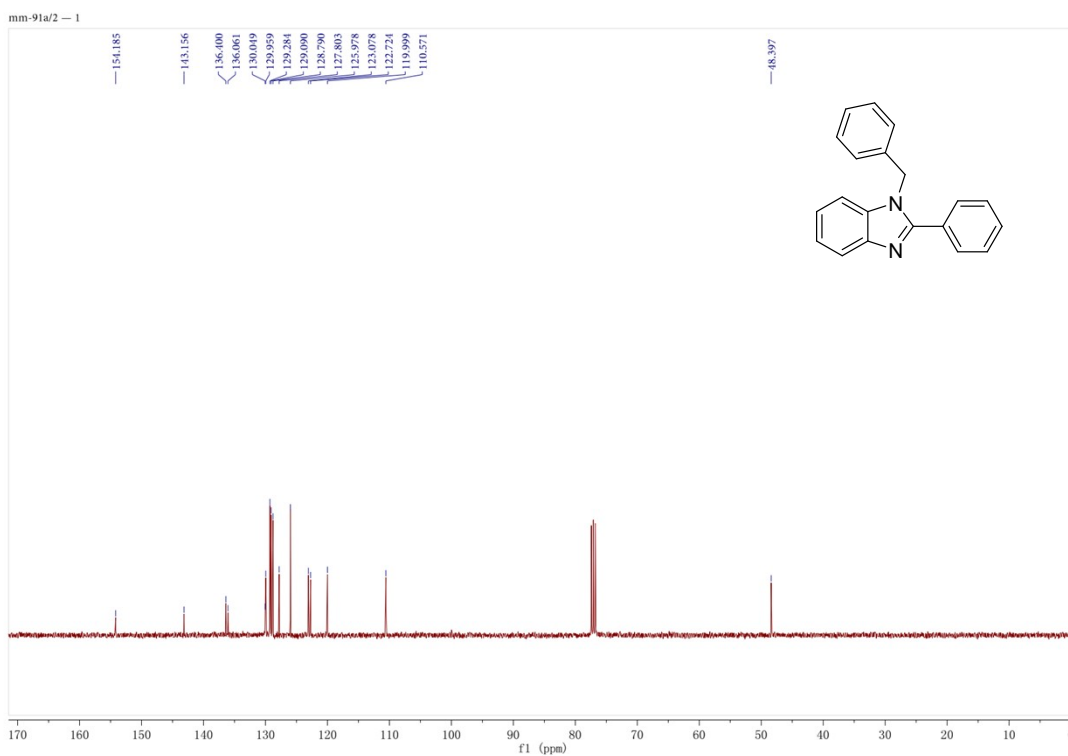

6e

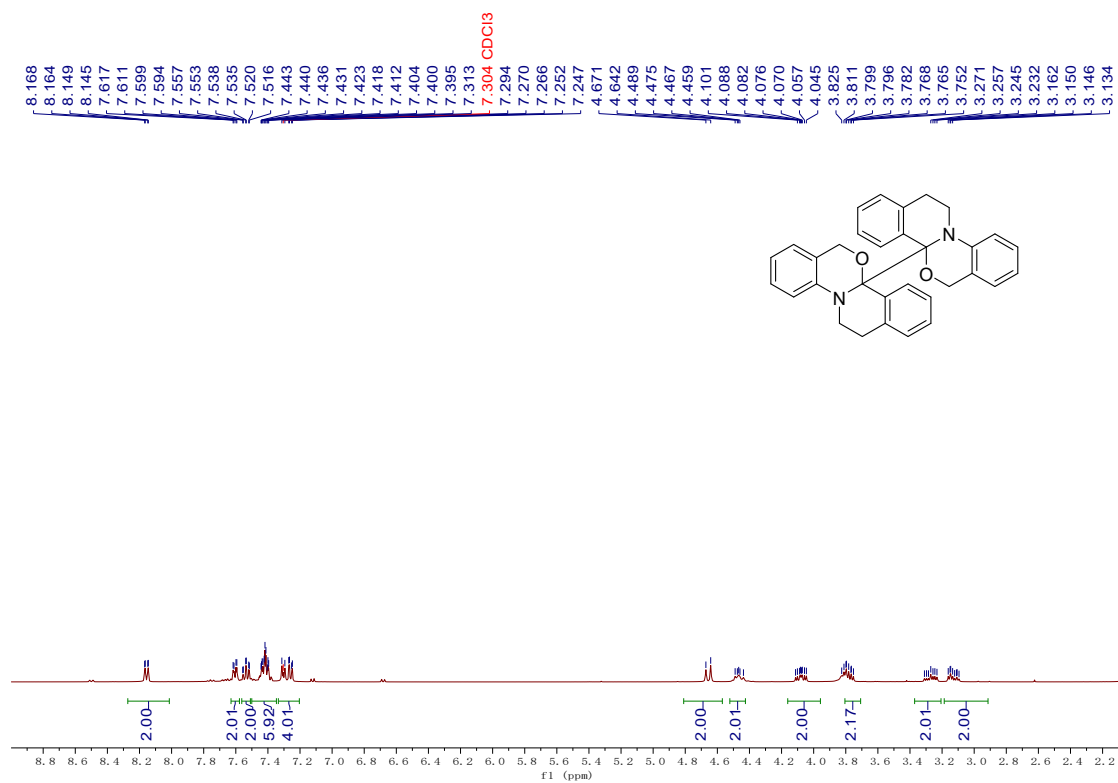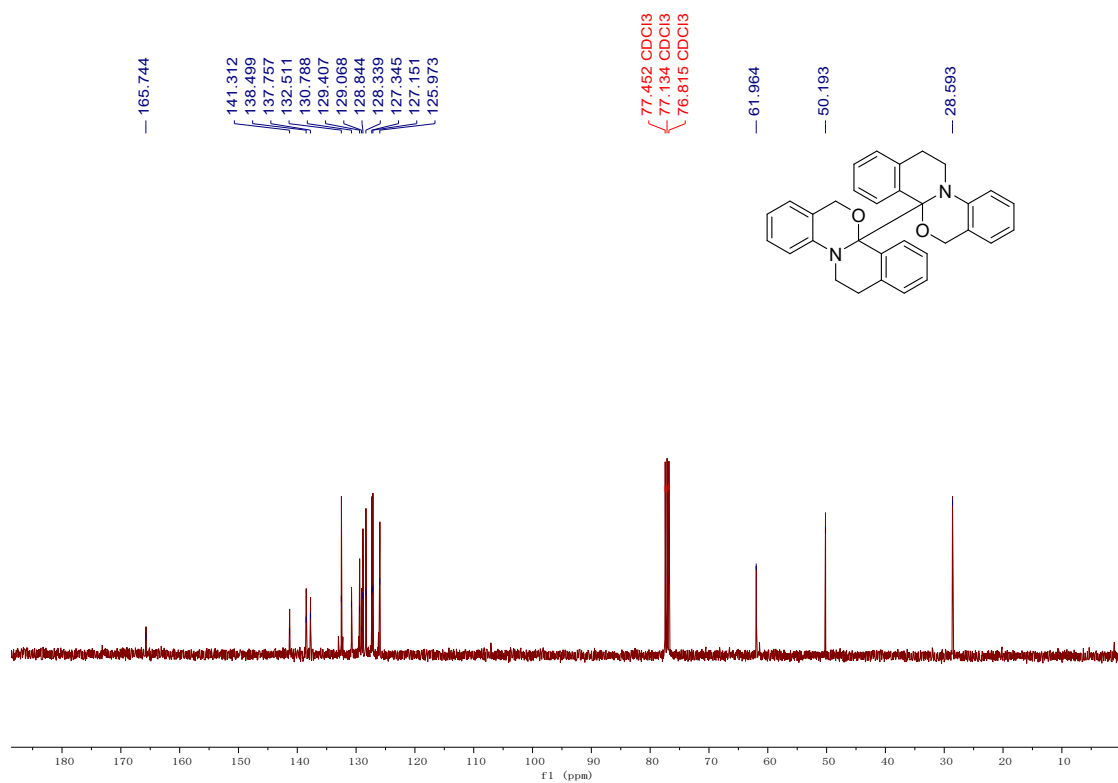

## 8. HRMS spectra

2b

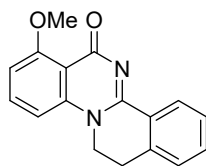

### Elemental Composition Report

Page 1

#### Single Mass Analysis

Tolerance = 30.0 PPM / DBE: min = -1.5, max = 50.0

Element prediction: Off

Number of isotope peaks used for i-FIT = 3

Monoisotopic Mass, Even Electron Ions

395 formula(e) evaluated with 1 results within limits (up to 50 best isotopic matches for each mass)

Elements Used:

C: 17-17 H: 10-20 N: 0-6 O: 0-8 Cl: 0-2 Br: 0-2

1

0114-1-zr-2b 129 (0.732)

1: TOF MS ES+  
3.43e+006

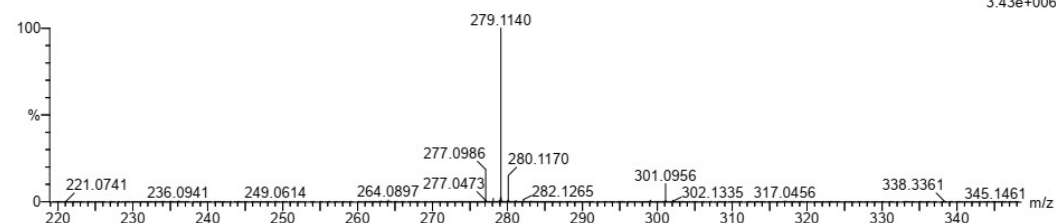

Minimum: -1.5  
Maximum: 5.0 30.0 50.0

| Mass     | Calc. Mass | mDa | PPM | DBE  | i-FIT  | Norm | Conf (%) | Formula       |
|----------|------------|-----|-----|------|--------|------|----------|---------------|
| 279.1140 | 279.1134   | 0.6 | 2.1 | 11.5 | 1338.6 | n/a  | n/a      | C17 H15 N2 O2 |

2e

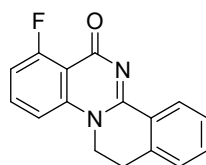

### Elemental Composition Report

Page 1

#### Single Mass Analysis

Tolerance = 10.0 PPM / DBE: min = -1.5, max = 50.0

Element prediction: Off

Number of isotope peaks used for i-FIT = 3

Monoisotopic Mass, Even Electron Ions

309 formula(e) evaluated with 1 results within limits (up to 50 closest results for each mass)

Elements Used:

C: 16-16 H: 0-100 N: 0-10 O: 0-10 F: 1-3

1

0114-1-zr-2e 110 (0.626)

1: TOF MS ES+  
4.35e+006

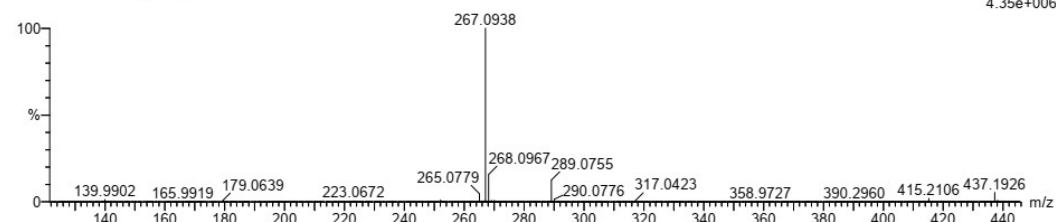

Minimum: -1.5  
Maximum: 5.0 10.0 50.0

| Mass     | Calc. Mass | mDa | PPM | DBE  | i-FIT  | Norm | Conf (%) | Formula        |
|----------|------------|-----|-----|------|--------|------|----------|----------------|
| 267.0938 | 267.0934   | 0.4 | 1.5 | 11.5 | 1263.1 | n/a  | n/a      | C16 H12 N2 O F |



2f

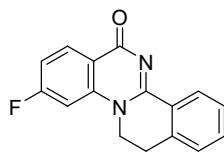

### Elemental Composition Report

Page 1

#### Single Mass Analysis

Tolerance = 10.0 PPM / DBE: min = -1.5, max = 50.0

Element prediction: Off

Number of isotope peaks used for i-FIT = 3

Monoisotopic Mass, Even Electron Ions

309 formula(e) evaluated with 1 results within limits (up to 50 closest results for each mass)

Elements Used:

C: 16-16 H: 0-100 N: 0-10 O: 0-10 F: 1-3

0114-1-zr-2f 115 (0.652)

1: TOF MS ES+

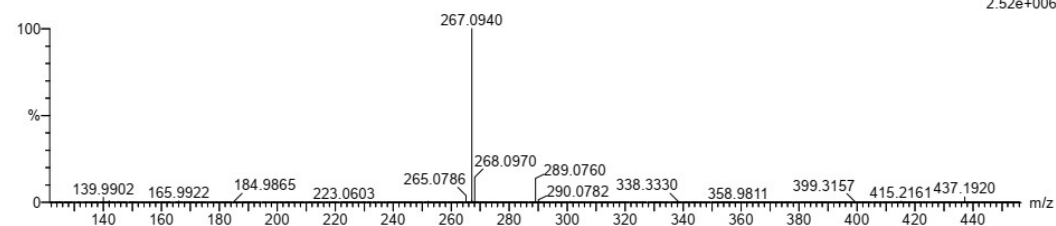

Minimum: -1.5  
Maximum: 50.0

| Mass     | Calc. Mass | mDa | PPM | DBE  | i-FIT  | Norm | Conf (%) | Formula        |
|----------|------------|-----|-----|------|--------|------|----------|----------------|
| 267.0940 | 267.0934   | 0.6 | 2.2 | 11.5 | 1147.7 | n/a  | n/a      | C16 H12 N2 O F |

2g

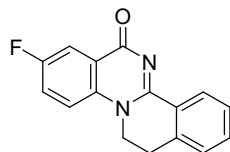

### Elemental Composition Report

Page 1

#### Single Mass Analysis

Tolerance = 30.0 PPM / DBE: min = -1.5, max = 50.0

Element prediction: Off

Number of isotope peaks used for i-FIT = 3

Monoisotopic Mass, Even Electron Ions

172 formula(e) evaluated with 1 results within limits (up to 50 best isotopic matches for each mass)

Elements Used:

C: 16-17 H: 10-20 N: 0-6 O: 0-8 Cl: 0-2 F: 1-1

1

0114-1-zr-2g 114 (0.647)

1: TOF MS ES+  
1.31e+006

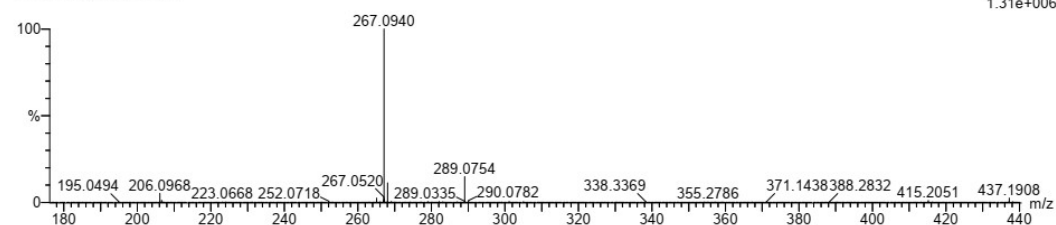

Minimum: -1.5  
Maximum: 50.0

| Mass     | Calc. Mass | mDa | PPM | DBE  | i-FIT  | Norm | Conf (%) | Formula        |
|----------|------------|-----|-----|------|--------|------|----------|----------------|
| 267.0940 | 267.0934   | 0.6 | 2.2 | 11.5 | 1031.0 | n/a  | n/a      | C16 H12 N2 O F |

2i

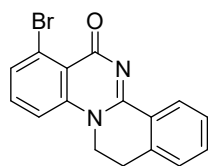

## Elemental Composition Report

Page 1

## Single Mass Analysis

Tolerance = 30.0 PPM / DBE: min = -1.5, max = 50.0

Element prediction: Off

Number of isotope peaks used for i-FIT = 3

Monoisotopic Mass, Even Electron Ions

440 formula(e) evaluated with 1 results within limits (up to 50 best isotopic matches for each mass)

Elements Used:

C: 16-17 H: 10-20 N: 0-6 O: 0-8 Cl: 0-2 Br: 0-2

1  
0114-1-zr-2i 124 (0.707)1: TOF MS ES+  
9.82e+004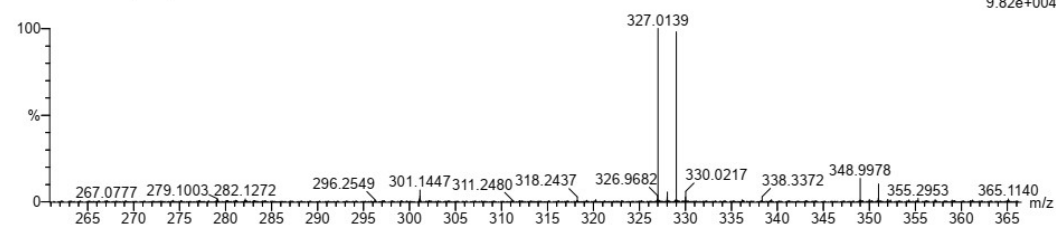Minimum: -1.5  
Maximum: 5.0 30.0 50.0

| Mass     | Calc. Mass | mDa | PPM | DBE  | i-FIT | Norm | Conf (%) | Formula         |
|----------|------------|-----|-----|------|-------|------|----------|-----------------|
| 327.0139 | 327.0133   | 0.6 | 1.8 | 11.5 | 733.8 | n/a  | n/a      | C16 H12 N2 O Br |

2k

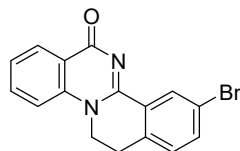

## Elemental Composition Report

Page 1

## Single Mass Analysis

Tolerance = 30.0 PPM / DBE: min = -1.5, max = 50.0

Element prediction: Off

Number of isotope peaks used for i-FIT = 3

Monoisotopic Mass, Even Electron Ions

440 formula(e) evaluated with 1 results within limits (up to 50 best isotopic matches for each mass)

Elements Used:

C: 16-17 H: 10-20 N: 0-6 O: 0-8 Cl: 0-2 Br: 0-2

1  
0114-1-zr-2k 129 (0.733)1: TOF MS ES+  
3.06e+004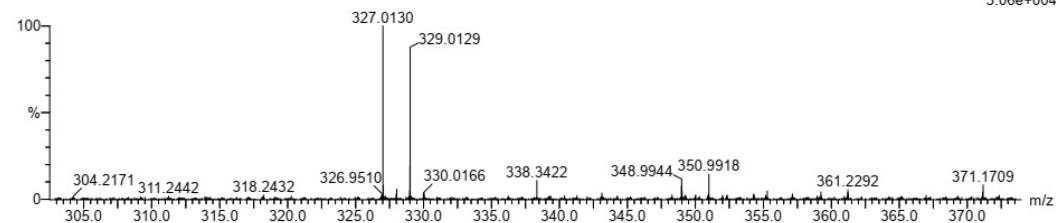Minimum: -1.5  
Maximum: 5.0 30.0 50.0

| Mass     | Calc. Mass | mDa  | PPM  | DBE  | i-FIT | Norm | Conf (%) | Formula         |
|----------|------------|------|------|------|-------|------|----------|-----------------|
| 327.0130 | 327.0133   | -0.3 | -0.9 | 11.5 | 743.6 | n/a  | n/a      | C16 H12 N2 O Br |
